# Supplementary material for: Mitochondrial transcription factor A in RORγt+ lymphocytes regulate small intestine homeostasis and metabolism
Source: PubMed Central journal article supplement (PMC8298438; doi:10.1038/s41467-021-24755-9), 2021-07-22
Supplement: 41467_2021_24755_MOESM1_ESM.pdf [file 41467_2021_24755_MOESM1_ESM.pdf]

## **Supplementary information**

### **Mitochondrial transcription factor A in ROR $\gamma$ <sup>t</sup> lymphocytes regulate small intestine homeostasis and metabolism**

**Zheng Fu<sup>1</sup>, Joseph W. Dean<sup>1</sup>, Lifeng Xiong<sup>1</sup>, Michael W. Dougherty<sup>2</sup>, Kristen N. Oliff<sup>1</sup>,**

**Zong-ming E. Chen<sup>3</sup>, Christian Jobin<sup>1,2</sup>, Timothy J. Garrett<sup>4</sup>, and Liang Zhou<sup>1\*</sup>**

<sup>1</sup> Department of Infectious Diseases and Immunology, College of Veterinary Medicine, University of Florida, Gainesville, FL 32608, USA

<sup>2</sup> Department of Medicine, University of Florida, Gainesville, FL, 32608 USA.

<sup>3</sup> Department of Laboratory Medicine and Pathology, Mayo Clinic, Rochester, MN 55905, USA

<sup>4</sup> Department of Pathology, Immunology and Laboratory Medicine, University of Florida, Gainesville, FL, 32608 USA.

\* Correspondence: Liang Zhou; Tel: 352-294-8293; Fax: 352-392-9704; liangzhou497@ufl.edu

## Supplementary figures

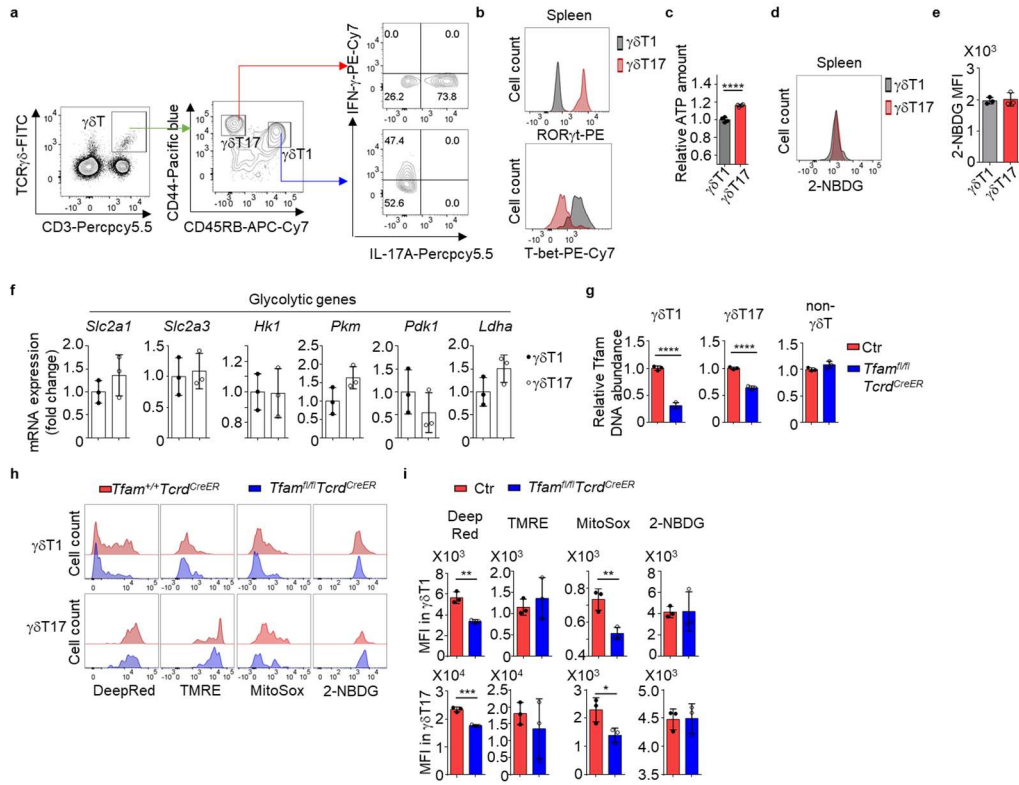

**Supplementary Fig. 1 Tfam deficiency affects  $\gamma\delta T1$  and  $\gamma\delta T17$  cells differentially.** **a**, Flow cytometry gating strategy of splenic  $\gamma\delta T$ ,  $\gamma\delta T1$  and  $\gamma\delta T17$  cells and IL-17A and IFN- $\gamma$  expression in the splenic  $\gamma\delta T1$  and  $\gamma\delta T17$  cells. Representative data of three independent experiments. This gating strategy were also used for gating in Fig. 1. **b**, ROR $\gamma t$  and T-bet expression in the splenic  $\gamma\delta T1$  and  $\gamma\delta T17$  cells by flow cytometry. Representative data of two independent experiments. **c**, Cellular ATP in splenic  $\gamma\delta T1$  cells and  $\gamma\delta T17$  cells of 3-week-old C57BL/6 mice. Each dot represented one replicate of cells sorted from pooled spleens of two 3-week-old C57BL/6 mice ( $n=4$  for each group) ( $****P<0.0001$ ). Representative data from three independent experiments. Data were normalized to equal cell number for each group. **d**, 2-NBDG uptake in the splenic  $\gamma\delta T1$  and  $\gamma\delta T17$  cells of C57BL/6 mice by flow cytometry. Representative data of three independent experiments. **e**, Mean fluorescence intensity (MFI) of 2-NBDG in **d** ( $n=3$ ) ( $P=0.7809$ ). Compiled data from one experiment. **f**, Expression of several key glycolytic genes in splenic  $\gamma\delta T1$  and  $\gamma\delta T17$  cells measured by qRT-PCR ( $n=3$  biological repeats) (*Slc2a1*,  $P=0.2893$ ; *Slc2a3*,  $P=0.7310$ ; *Hk1*,  $P=0.9476$ ; *Pkm*,  $P=0.0814$ ; *Pdk1*,  $P=0.2929$ ; *Ldha*,  $P=0.1115$ ). Compiled data from two independent experiments. **g**, *Tfam* deletion efficiency at *Tfam* locus (exon 7) related to *Hbb* (encoding hemoglobin beta chain complex) locus in splenic  $\gamma\delta T1$  cells,  $\gamma\delta T17$  cells and non- $\gamma\delta T$  lymphocytes measured by genomic qPCR ( $n=3$  for each group) ( $\gamma\delta T1$ :  $****P<0.0001$ ;  $\gamma\delta T17$ :  $****P<0.0001$ ; non- $\gamma\delta T$ :  $P=0.1030$ ). Ctr or *Tfam*<sup>fl/fl</sup>*Tcrd*<sup>CreER</sup> mice were treated with tamoxifen (2mg/mouse by IP injection) daily for 5 days. Data were collected 3 days after the last tamoxifen injection. Representative data of two independent experiments. **h**, MitoTracker-Deep Red, TMRE, MitoSox<sup>TM</sup> Red and 2-NBDG staining in splenic  $\gamma\delta T1$  and  $\gamma\delta T17$  cells by flow cytometry. Representative data of two independent experiments. **i**, MitoTracker-Deep Red, TMRE, MitoSox<sup>TM</sup> Red and 2-NBDG mean fluorescence intensity (MFI) ( $n=3$ ) ( $\gamma\delta T1$ : DeepRed,  $**P=0.0024$ ; TMRE,  $P=0.5272$ ; MitoSox,  $**P=0.0085$ ; 2-NBDG,  $P=0.9688$ ;  $\gamma\delta T17$ : DeepRed,

\*\*\* $P=0.0004$ ; TMRE,  $P=0.4551$ ; MitoSox, \* $P=0.0348$ ; 2-NBDG,  $P=0.9365$ ). Compiled data from one experiment. Ctr included  $Tfam^{+/+}Tcrd^{CreER}$  and  $Tfam^{fl/+}Tcrd^{CreER}$  mice in **g** and **i**. Data are shown as mean  $\pm$  SD in **c**, **e-g**, **i**.

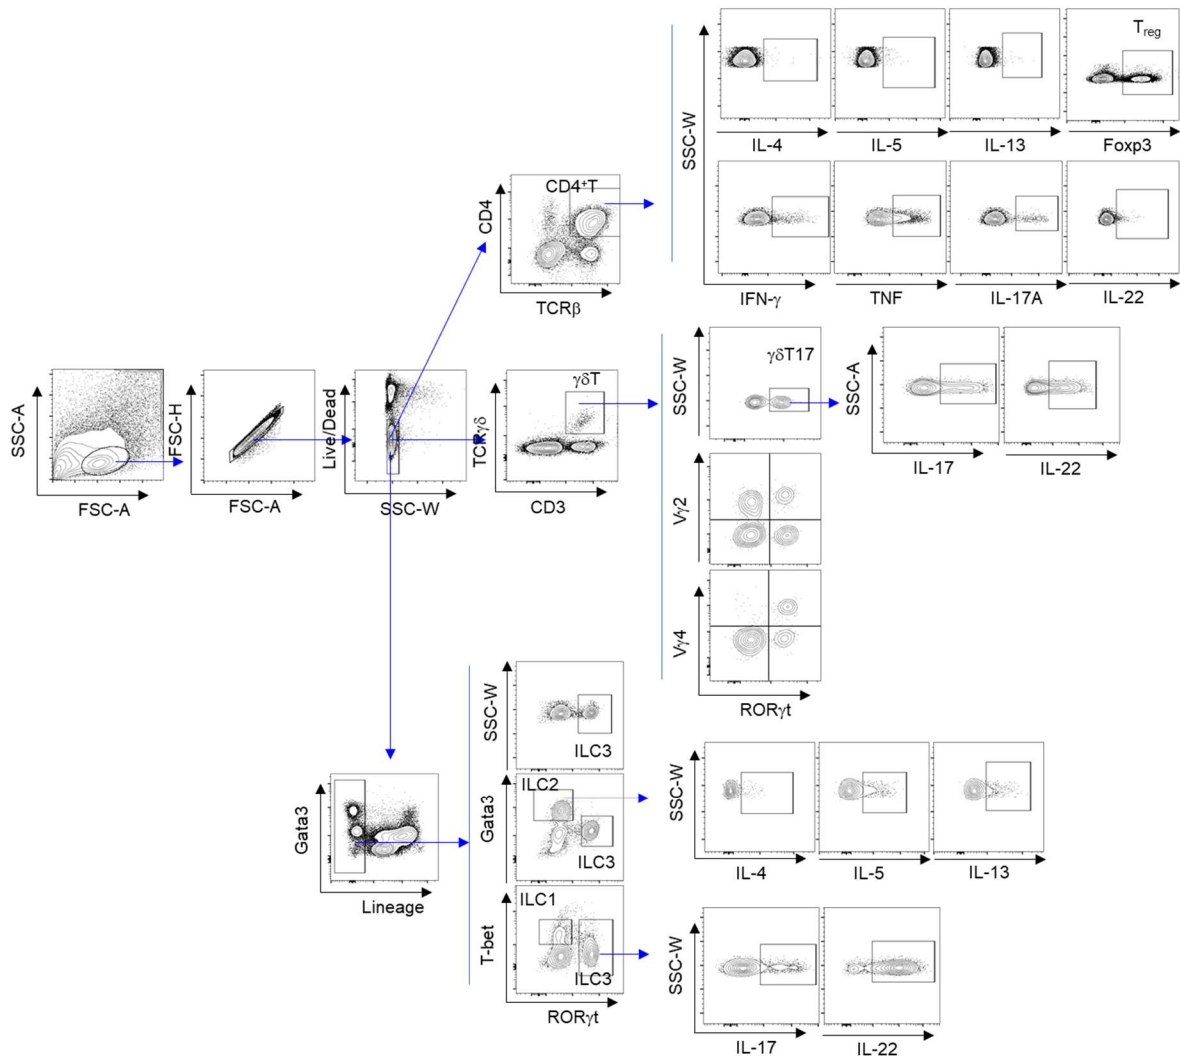

**Supplementary Fig. 2 Gating strategies used for identification of different cell types.** These gating strategies were used in main figures from Figure 2 to Figure 6 and Supplementary Figure 3 to 5.

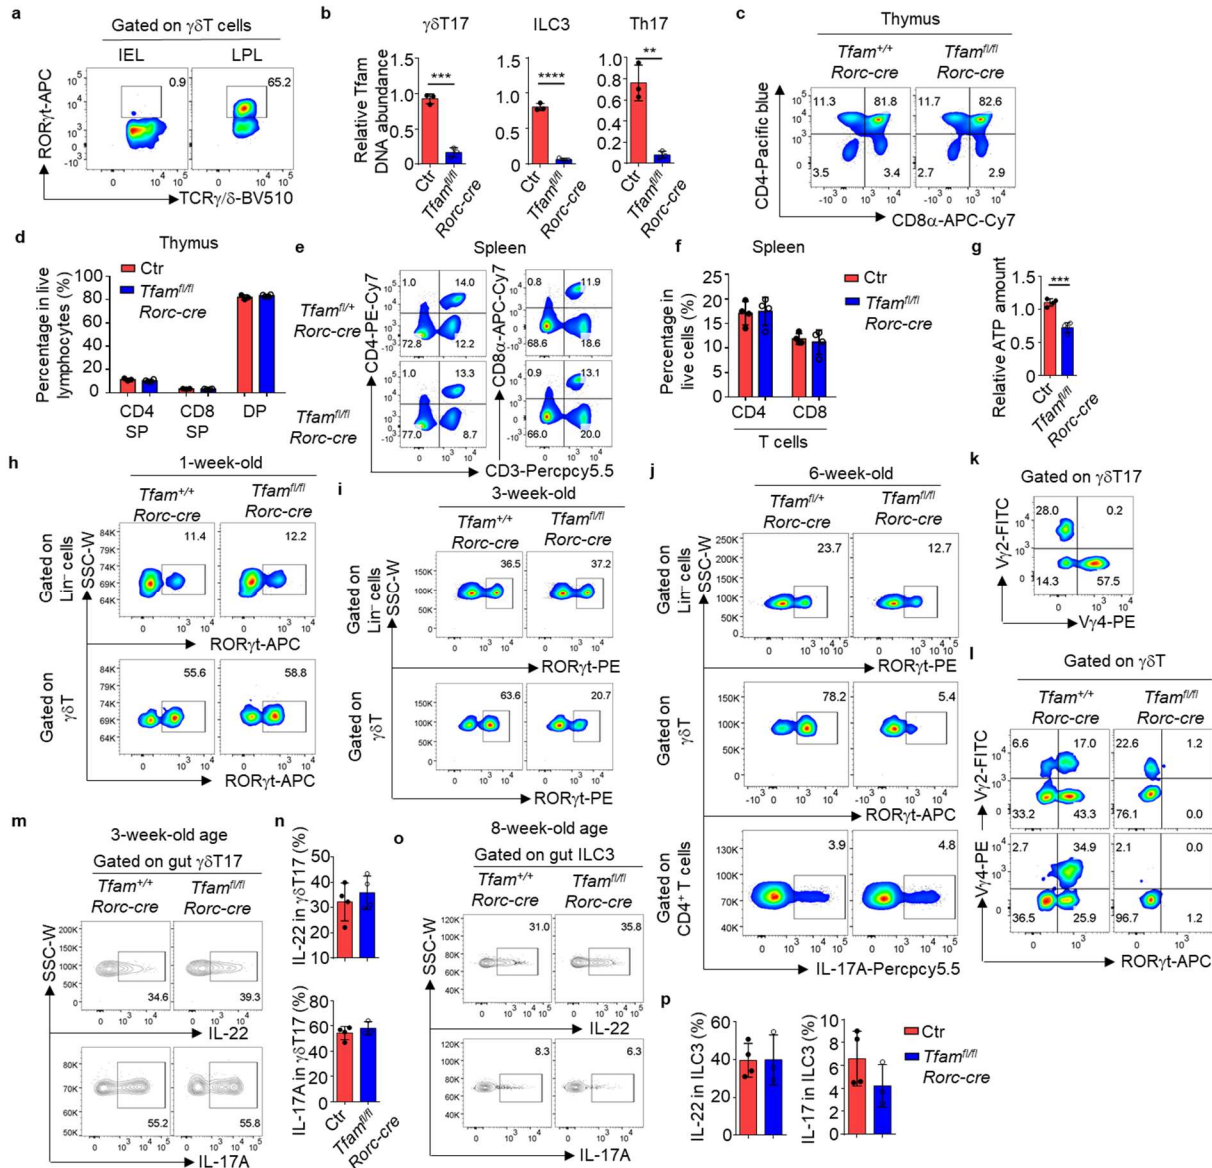

**Supplementary Fig. 3** *Tfam* is critical for ILC3 and  $\gamma\delta$ T17 cell maintenance in the gut. Ctr included *Tfam*<sup>+/+</sup>, *Tfam*<sup>fl/+</sup>, *Tfam*<sup>fl/fl</sup>, *Tfam*<sup>+/+</sup>/*Rorc-cre* and *Tfam*<sup>fl/+</sup>/*Rorc-cre* mice. **a**, ROR $\gamma$ t expression in  $\gamma\delta$ T cells of the intraepithelial lymphocyte (IEL) and lamina propria lymphocytes (LPL) of the large intestine of C57BL/6 mice measured by flow cytometry. Gated on CD3<sup>+</sup>TCR $\gamma/\delta$ <sup>+</sup> lymphocytes. Representative data of two independent experiments. **b**, *Tfam* deletion efficiency at *Tfam* locus (exon 7) related to *Hbb* in large intestinal  $\gamma\delta$ T17 cells (left) ( $***P=0.0002$ ), ILC3s (middle) ( $****P<0.0001$ ) and Th17 cells (right) ( $**P=0.0024$ ) ( $n=3$  biological repeats). Ctr included *Tfam*<sup>+/+</sup>/*Rorc-cre* and *Tfam*<sup>fl/+</sup>/*Rorc-cre* mice. Representative data of two independent experiments. **c**, CD4 and CD8 $\alpha$  expression in the thymus of mice with indicated genotypes assessed by flow cytometry. Representative data of two independent experiments. **d**, CD4<sup>+</sup>CD8 $\alpha$ <sup>-</sup> cells (CD4 SP) ( $P=0.2595$ ), CD4<sup>-</sup>CD8 $\alpha$ <sup>+</sup> cells (CD8 SP) ( $P=0.4569$ ) and CD4<sup>+</sup>CD8 $\alpha$ <sup>+</sup> cells (DP) percentages ( $P=0.2422$ ) in total lymphocytes shown in **c** (Ctr,  $n=3$ , *Tfam*<sup>fl/fl</sup>/*Rorc-cre*,  $n=4$ ). Compiled data from one experiment. **e**, CD4<sup>+</sup>T cells and CD8<sup>+</sup>T cells in the spleen of mice with indicated genotypes assessed by flow cytometry. Representative data of two independent experiments. **f**, CD4<sup>+</sup>T cells and CD8<sup>+</sup>T cells percentages in total lymphocytes ( $n=4$ ) (CD4<sup>+</sup>T:  $P=0.8378$ ; CD8<sup>+</sup>T:  $P=0.6332$ ).

Compiled data from two independent experiments. **g**, Cellular ATP in splenic  $\gamma\delta$ T17 cells of 3-week-old Ctr and *Tfam<sup>fl/fl</sup>Rorc-cre* mice ( $***P=0.0002$ ). Each dot represented one replicate of cells sorted from pooled spleens of two 3-week-old mice of indicated genotypes (n=4 for each group). Representative data from two independent experiments. Data were normalized to equal cell number for each group. **h**, ILC3s (upper panel, gated on Lin<sup>-</sup> lymphocytes) and  $\gamma\delta$ T17 cells (lower panel, gated on  $\gamma\delta$ T cells) in the large intestine of 1-week-old mice with indicated genotypes measured by flow cytometry. Representative data of three independent experiments. Lineage (Lin) markers include CD3, CD5, CD19, Ly6G, CD11b, CD11c. **i**, ILC3s (upper panel, gated on Lin<sup>-</sup> lymphocytes) and  $\gamma\delta$ T17 cells (lower panel, gated on  $\gamma\delta$ T cells) in the large intestine of 3-week-old mice with indicated genotypes measured by flow cytometry. Representative data of three independent experiments. **j**, ILC3s (upper panel, gated on Lin<sup>-</sup> lymphocytes),  $\gamma\delta$ T17 cells (middle panel, gated on  $\gamma\delta$ T cells) and Th17 cells (lower panel, gated on CD4<sup>+</sup>T cells) in the large intestine of 6-week-old mice with indicated genotypes measured by flow cytometry. Representative data of three independent experiments. **k**, T cell receptor (TCR) V $\gamma$ 2 and V $\gamma$ 4 expression on  $\gamma\delta$ T17 cells in the large intestine LPL of 6-week-old wild-type mice measured by flow cytometry. Representative data of three independent experiments. **l**, TCR V $\gamma$ 2, V $\gamma$ 4 and ROR $\gamma$ t expression on total  $\gamma\delta$ T cells from large intestine LPL of 6-week-old mice with indicated genotypes measured by flow cytometry. Representative data of two independent experiments. **m**, Flow cytometry analyses of IL-22 and IL-17A expression by  $\gamma\delta$ T17 cells in small intestine LPL of 3-week-old mice with indicated genotypes. **n**, Percentages of IL-22<sup>+</sup>  $\gamma\delta$ T17 and IL-17A<sup>+</sup>  $\gamma\delta$ T17 within total  $\gamma\delta$ T17 cells shown in **m** (Ctr, n=4; *Tfam<sup>fl/fl</sup>Rorc-cre*, n=4 for IL-22<sup>+</sup>  $\gamma\delta$ T17, n=3 for IL-17A<sup>+</sup>  $\gamma\delta$ T17) (IL-22<sup>+</sup>,  $P=0.8713$ ; IL-17<sup>+</sup>,  $P=0.7020$ ). Compiled data from two independent experiments. **o**, Flow cytometry analyses of IL-22 and IL-17A expression in ILC3s from large intestine LPL of 8-week-old mice with indicated genotypes. **p**, Percentages of IL-22<sup>+</sup> ILC3 and IL-17A<sup>+</sup> ILC3s within total ILC3s shown in **o** (Ctr, n=4; *Tfam<sup>fl/fl</sup>Rorc-cre*, n=3) (IL-22<sup>+</sup>,  $P=0.5633$ ; IL-17<sup>+</sup>,  $P=0.2237$ ). Compiled data from two independent experiments. Data are shown as mean  $\pm$  SD in **b**, **d**, **f**, **g**, **n**, **p**.

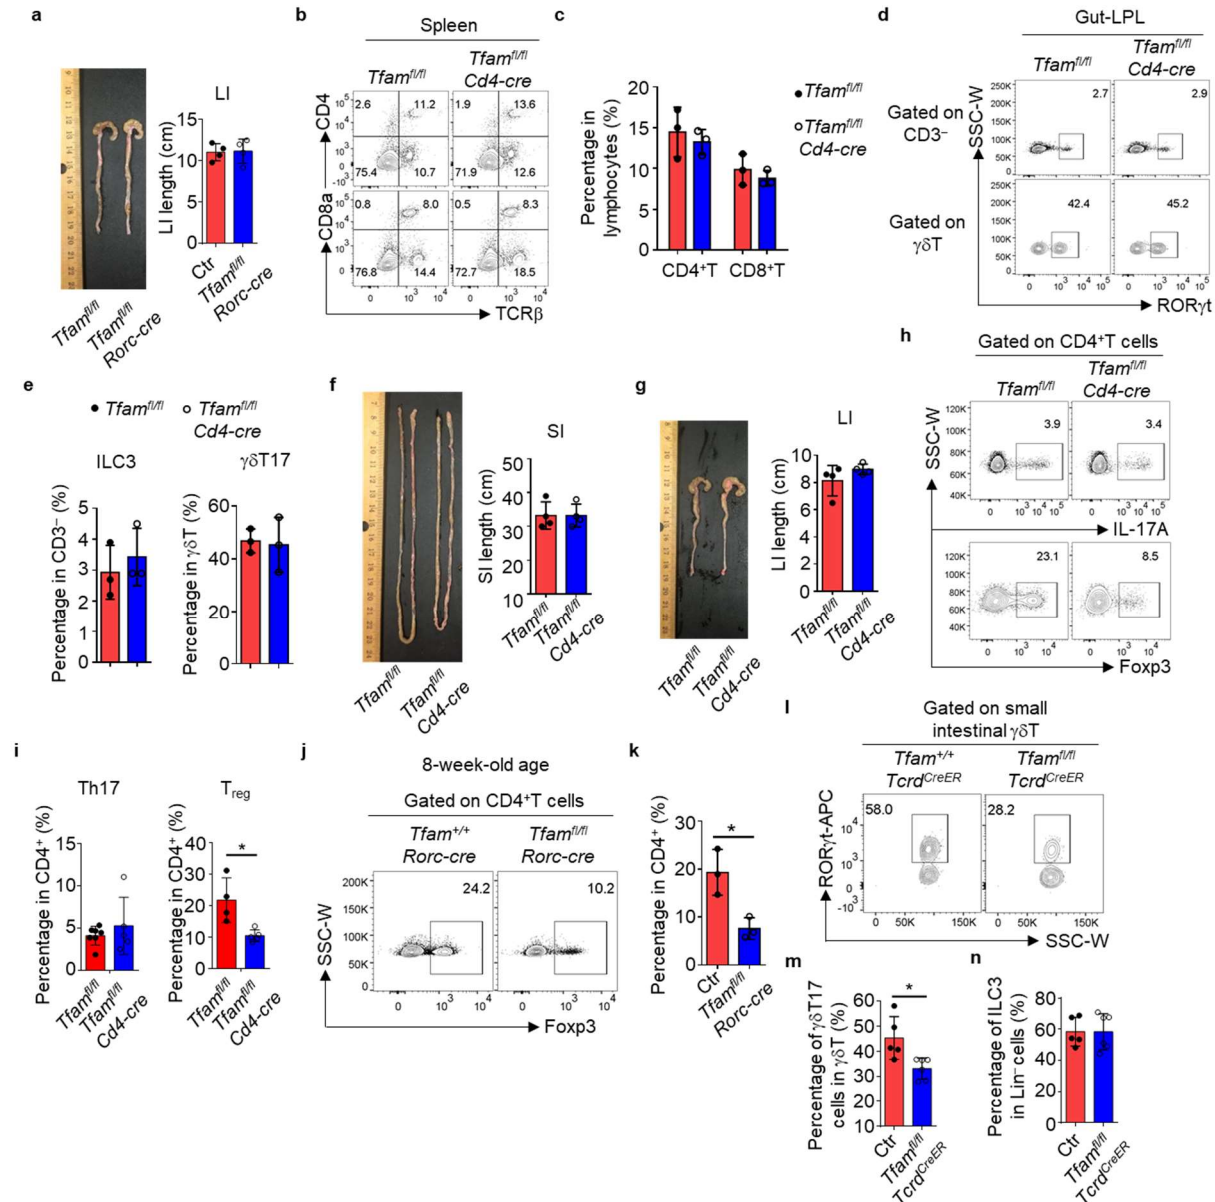

**Supplementary Fig. 4 *Tfam* deficiency in  $\gamma\delta$ T17 cells perturbs the small intestine tissue homeostasis.** Ctr included *Tfam<sup>fl/+</sup>*, *Tfam<sup>fl/fl</sup>*, *Tfam<sup>+/+</sup>Rorc-cre* and *Tfam<sup>fl/+</sup>Rorc-cre* mice in **a** and **k**. **a**, Left panel, picture of the large intestine of 12-week-old control (Ctr) and *Tfam<sup>fl/fl</sup>Rorc-cre* mice. Representative data of three independent experiments. Right panel, large intestine length in different ages of mice with indicated genotypes (n=4) ( $P=0.8933$ ). Compiled data from two independent experiments. **b**, Flow cytometry analyses of TCR $\beta$ , CD4 and CD8 $\alpha$  expression in splenic lymphocytes from 8-week-old mice with indicated genotypes. **c**, Percentages of CD4<sup>+</sup> and CD8<sup>+</sup> T cells within live lymphocytes shown in **b** (n=3 for each group) (CD4<sup>+</sup> T,  $P=0.1275$ ; CD8<sup>+</sup> T,  $P=0.0874$ ). Compiled data from two independent experiments. **d**, Flow cytometry analyses of ROR $\gamma$ t expression in CD3<sup>-</sup> lymphocytes and total  $\gamma\delta$ T cells from large intestine LPL of 8-week-old mice with indicated genotypes. **e**, Percentages of ILC3s in CD3<sup>-</sup> lymphocytes ( $P=0.5537$ ) and  $\gamma\delta$ T17 cells in total  $\gamma\delta$ T cells ( $P=0.8267$ ) shown in **d** (n=3 for each group). Compiled data from one experiment. **f**, Left panel, picture of the small intestine of 3-month-old littermate mice with indicated genotypes. Right panel, small intestine length in mice with indicated genotypes (n=4 for

each group) ( $P > 0.9999$ ). Compiled data from two independent experiments. **g**, Left panel, picture of the large intestine of 3-month-old littermate mice with indicated genotypes. Right panel, large intestine length in mice with indicated genotypes ( $n=4$  for each group) ( $P=0.2134$ ). Compiled data from two independent experiments. **h**, Flow cytometry analyses of IL-17A and Foxp3 expression by CD4<sup>+</sup> T cells in large intestinal LPL of 8-week-old mice of indicated genotypes. **i**, Percentages of Th17 cells (*Tfam*<sup>fl/fl</sup>,  $n=7$ ; *Tfam*<sup>fl/fl</sup>*Cd4-cre*,  $n=5$ ) and T<sub>reg</sub> cells (*Tfam*<sup>fl/fl</sup>,  $n=4$ ; *Tfam*<sup>fl/fl</sup>*Cd4-cre*,  $n=5$ ) in CD4<sup>+</sup> T cells shown in **h** (Th17:  $P=0.4111$ ; T<sub>reg</sub> cells:  $*P=0.0103$ ). Compiled data from two independent experiments. **j**, Flow cytometry analyses of Foxp3 expression by CD4<sup>+</sup> T cells in large intestine LPL of 8-week-old mice with indicated genotypes. **k**, Percentages of T<sub>reg</sub> cells within CD4<sup>+</sup> T cells shown in **j** ( $n=3$  for each group) ( $*P=0.0186$ ). **l**, ROR $\gamma$ t expression in small intestinal  $\gamma\delta$ T cells in mice with indicated genotypes measured by flow cytometry. Representative data of three independent experiments. Mice were treated with tamoxifen daily for 5 days. Data were collected three weeks after the last tamoxifen injection. **m**, ROR $\gamma$ t<sup>+</sup> $\gamma\delta$ T (i.e.,  $\gamma\delta$ T17) cell percentages within total small intestinal  $\gamma\delta$ T cells (Ctr,  $n=5$ ; *Tfam*<sup>fl/fl</sup>*Tcrd*<sup>CreER</sup>,  $n=6$ ) ( $*P=0.0284$ ). Compiled data from three independent experiments. **n**, ILC3s in Lin<sup>-</sup> lymphocytes in the small intestine of mice with indicated genotypes (Ctr,  $n=5$ ; *Tfam*<sup>fl/fl</sup>*Tcrd*<sup>CreER</sup>,  $n=6$ ) ( $P=0.9941$ ). Compiled data from three independent experiments. Ctr included *Tfam*<sup>+/+</sup>*Tcrd*<sup>CreER</sup> and *Tfam*<sup>fl/+</sup>*Tcrd*<sup>CreER</sup> mice in **m** and **n**. Data are shown as mean  $\pm$  SD in **a**, **c**, **e-g**, **i**, **k**, **m**, **n**.



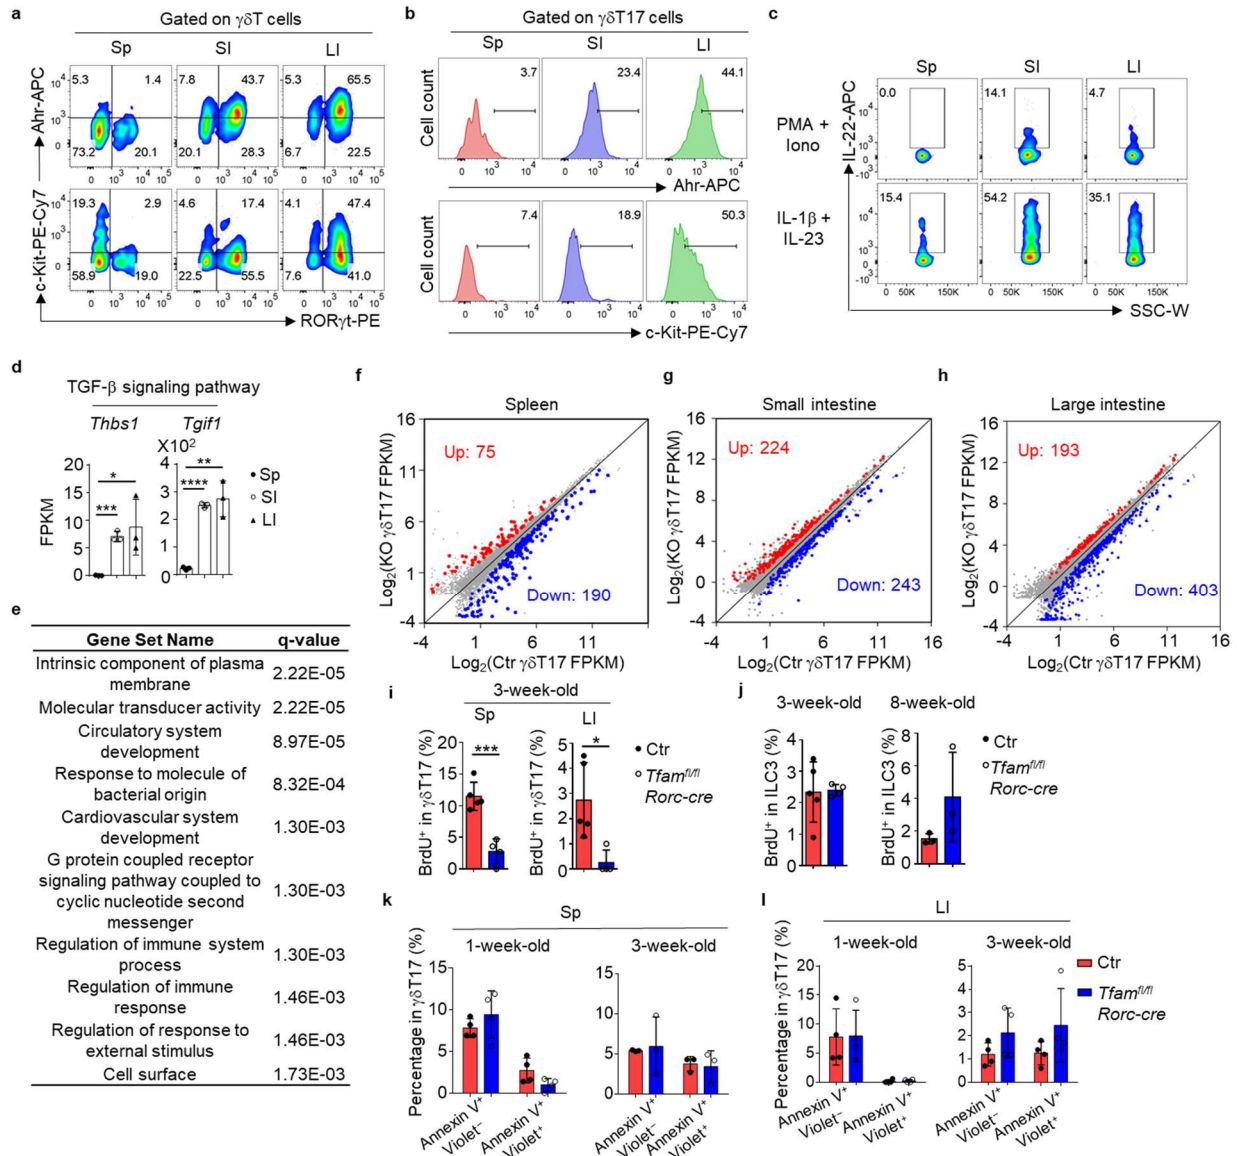

**Supplementary Fig. 5 Tissue-specific transcriptomic signature of  $\gamma\delta$ T17 cells.** **a**, Expression of Ahr, c-Kit and ROR $\gamma$ t by  $\gamma\delta$ T cells in Sp, SI and LI of wild-type mice measured by flow cytometry. Representative data of two independent experiments. **b**, Ahr and c-Kit expression by  $\gamma\delta$ T17 cells in Sp, SI and LI of wild-type mice measured by flow cytometry. Representative data of two independent experiments. **c**, Expression of IL-22 by  $\gamma\delta$ T17 cells in Sp, SI and LI of wild-type mice measured by flow cytometry. Cells were stimulated with IL-1 $\beta$  (10ng/ml) and IL-23 (10ng/ml) for 6 hours. Representative data of one independent experiment. **d**, RNA-seq FPKM values of indicated gene expression by  $\gamma\delta$ T17 cells in Sp, SI, and LI of wild-type mice (mean  $\pm$  SD) (n=3) (Sp vs. SI: *Thbs1*, \*\*\**P*=0.0002, *Tgif1*, \*\*\*\**P*<0.0001; Sp vs. LI: *Thbs1*, \**P*=0.0398, *Tgif1*, \*\**P*=0.0026). **e**, Gene Ontology (GO) analysis of the 50 splenic TSGs shown in **Fig. 4b**. **f-h**, Differential gene expression by RNA-seq analysis of splenic (**f**), small intestinal (**g**) or large intestinal (**h**) control (Ctr) and *Tfam*-deficient (KO)  $\gamma\delta$ T17 cells (fold change  $\geq$  1.5, q value  $\leq$  0.05) (n=3). Each sample was sorted from an individual mouse. **i**, Percentages of BrdU $^{+}$   $\gamma\delta$ T17 cells within total splenic and large intestinal  $\gamma\delta$ T17 cells from 3-week-old mice by flow cytometry analysis (Ctr, n=5; *Tfam* $^{fl/fl}$ *Rorc-cre*, n=4) (Sp, \*\*\**P*=0.0005; LI, \**P*=0.0159). Compiled data from

two independent experiments. **j**, Percentages of BrdU<sup>+</sup> ILC3s within total large intestinal ILC3s from mice of indicated ages by flow cytometry analysis (3-week-old: Ctr, n=5; *Tfam<sup>fl/fl</sup>Rorc-cre*, n=4; 8-week-old: Ctr, n=3; *Tfam<sup>fl/fl</sup>Rorc-cre*, n=3) (3-week-old, *P*=0.7101; 8-week-old, *P*=0.3182). Compiled data from two independent experiments. **k-l**, Percentages of Annexin V<sup>+</sup>Violet<sup>-</sup> and Annexin V<sup>+</sup>Violet<sup>+</sup> cells in Sp (**i**) and LI (**j**)  $\gamma\delta$ T17 cells of 1-week-old and 3-week-old mice with indicated genotypes (n=4) measured by flow cytometry (Sp: 1-week-old, Annexin V<sup>+</sup>Violet<sup>-</sup>, *P*=0.3270, Annexin V<sup>+</sup>Violet<sup>+</sup>, *P*=0.0832; 3-week-old, Annexin V<sup>+</sup>Violet<sup>-</sup>, *P*=0.5499, Annexin V<sup>+</sup>Violet<sup>+</sup>, *P*=0.4648; LI: 1-week-old, Annexin V<sup>+</sup>Violet<sup>-</sup>, *P*=0.9592, Annexin V<sup>+</sup>Violet<sup>+</sup>, *P*=0.7199; 3-week-old, Annexin V<sup>+</sup>Violet<sup>-</sup>, *P*=0.1693, Annexin V<sup>+</sup>Violet<sup>+</sup>, *P*=0.1977). Compiled data from one experiment. Ctr included *Tfam<sup>+/+</sup>*, *Tfam<sup>fl/+</sup>*, *Tfam<sup>fl/fl</sup>*, *Tfam<sup>+/+</sup>Rorc-cre* and *Tfam<sup>fl/+</sup>Rorc-cre* mice in **f-l**. KO represented *Tfam<sup>fl/fl</sup>Rorc-cre* in **f-h**. Data are shown as mean  $\pm$  SD in **d**, **i-l**.

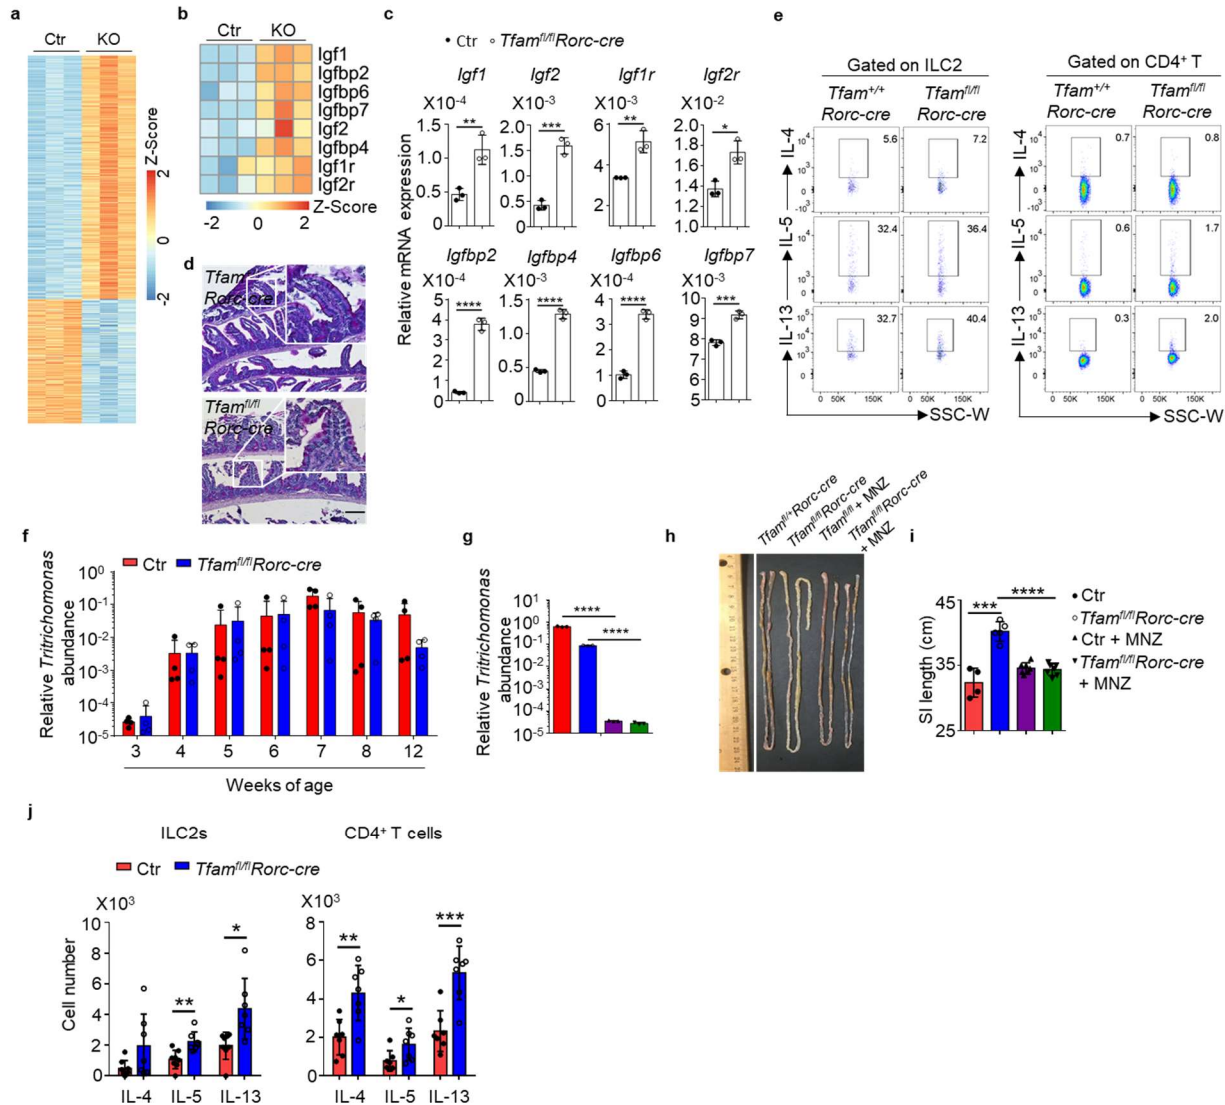

**Supplementary Fig. 6 Enhanced tuft cell-type 2 immune circuit in the small intestine of *Tfam<sup>fl/fl</sup>Rorc-cre* mice.** Ctr included *Tfam<sup>+/+</sup>Rorc-cre* and *Tfam<sup>fl/+</sup>Rorc-cre* mice. KO indicated *Tfam<sup>fl/fl</sup>Rorc-cre* mice in **a-c**. **a**, Heatmap of the 1838 differentially regulated genes from the RNA-seq analysis of small intestine tissues of Ctr and KO (n=3 for each group). Genes were ranked in a descending order based on the fold changes of expression (KO/Ctr). **b**, Heatmap of genes related to insulin growth factor (IGF) signaling by RNA-seq analysis of small intestinal tissues of Ctr and KO mice (n=3). Genes were ranked in a descending order based on the fold changes of expression (KO/Ctr). **c**, qRT-PCR of indicated genes in small intestine tissues of 3-month-old mice with indicated genotypes (n=3 for each group) (*Igf1*, \*\**P*=0.0083; *Igf2*, \*\*\**P*=0.0004; *Igf1r*, \*\**P*=0.0047; *Igf2r*, \**P*=0.0105; *Igfbp2*, \*\*\*\**P*<0.0001; *Igfbp4*, \*\*\*\**P*<0.0001; *Igfbp6*, \*\*\*\**P*<0.0001; *Igfbp7*, \*\*\**P*=0.0006). Compiled data from one independent experiments. **d**, PAS staining of small intestinal tissue sections of 12-week-old *Tfam<sup>+/+</sup>Rorc-cre* and *Tfam<sup>fl/fl</sup>Rorc-cre* mice. Representative data of three mice in each group. Scale bar, 200  $\mu$ m. **e**, Flow cytometry analysis of IL-4, IL-5 and IL-13 expression by ILC2s (gated on Lineage<sup>-</sup>Gata3<sup>+</sup>) and CD4<sup>+</sup> T cells (gated on CD3<sup>+</sup>CD4<sup>+</sup>) in small intestine draining lymph nodes (siLN) of 3-month-old mice with indicated genotypes. Representative data of two independent experiments. Lineage markers include CD3, CD5, CD19, Ly6G, CD11b, CD11c. **f**, q-PCR of *Trichostrongylus* abundance in feces of the mice with indicated genotypes at different ages (n=4 for each group) (week3, *P*=0.5919;

week4,  $P=0.9738$ ; week5,  $P=0.8352$ ; week6,  $P=0.9168$ ; week7,  $P=0.1559$ ; week8,  $P=0.5413$ ; week12,  $P=0.1898$ ). Ctr included *Tfam*<sup>+/+</sup>, *Tfam*<sup>fl/+</sup>, *Tfam*<sup>fl/fl</sup>, *Tfam*<sup>+/+</sup>*Rorc-cre* and *Tfam*<sup>fl/+</sup>*Rorc-cre* mice in **f**, **g**, **i** and **j**. **g**, *Trichomonas* abundance in feces of the mice treated with or without metronidazole (MNZ) (n=3) (Ctr vs. Ctr + MNZ: \*\*\*\* $P < 0.0001$ ; *Tfam*<sup>fl/fl</sup>*Rorc-cre* vs. *Tfam*<sup>fl/fl</sup>*Rorc-cre* + MNZ: \*\*\*\* $P < 0.0001$ ). Representative data from two independent experiments, and shown as triplicates of q-PCR. **h**, Picture of the small intestine of mice treated with or without MNZ shown in **g**. **i**, Small intestine length in mice with indicated genotypes shown in **h** (Ctr, n=4; *Tfam*<sup>fl/fl</sup>*Rorc-cre*, n=5; Ctr + MNZ, n=7; *Tfam*<sup>fl/fl</sup>*Rorc-cre* + MNZ, n=7) (Ctr vs. *Tfam*<sup>fl/fl</sup>*Rorc-cre*, \*\*\* $P = 0.0004$ ; *Tfam*<sup>fl/fl</sup>*Rorc-cre* vs. *Tfam*<sup>fl/fl</sup>*Rorc-cre* + MNZ, \*\*\*\* $P < 0.0001$ ). Compiled data from two independent experiments. **j**, IL-4, IL-5 and IL-13 expression by ILC2s and CD4<sup>+</sup> T cells in small intestine draining lymph nodes (siLN) of 12-week-old Ctr and *Tfam*<sup>fl/fl</sup>*Rorc-cre* mice infected with *Hpb* (n=7 for each group) (ILC2: IL-4,  $P=0.1098$ ; IL-5, \*\* $P=0.0048$ ; IL-13, \* $P=0.0163$ ; CD4<sup>+</sup> T: IL-4, \*\* $P=0.0041$ ; IL-5, \* $P=0.0392$ ; IL-13, \*\*\* $P=0.0006$ ). Data were collected 14 days after the infection. Compiled data from three independent experiments. Data are shown as mean  $\pm$  SD in **c**, **f**, **g**, **i**, **j**.

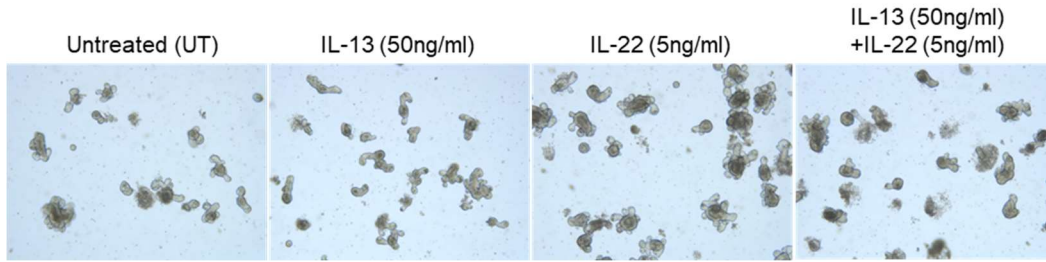

**Supplementary Fig. 7 IL-22 suppresses IL-13-induced tuft cell differentiation.** Enteroid culture with or without treatment of indicated cytokines for 2 days. Representative data of three independent experiments.

a

| Gene Set Name (GO)                                      | q-value  |
|---------------------------------------------------------|----------|
| Response to oxygen containing compound                  | 2.03E-64 |
| Biological adhesion                                     | 1.86E-61 |
| Small molecule metabolic process                        | 1.52E-58 |
| Transmembrane transport                                 | 3.93E-54 |
| Defense response                                        | 6.18E-52 |
| Homeostatic process                                     | 6.65E-50 |
| Response to cytokine                                    | 4.33E-48 |
| Regulation of immune system process                     | 7.59E-45 |
| Inflammatory response                                   | 1.03E-44 |
| Lipid metabolic process                                 | 1.70E-41 |
| Organic acid metabolic process                          | 2.06E-41 |
| Response to lipid                                       | 3.91E-39 |
| Regulation of cell population proliferation             | 3.32E-37 |
| Cellular response to endogenous stimulus                | 6.98E-37 |
| Negative regulation of multicellular organismal process | 1.32E-36 |
| Cell-cell signaling                                     | 4.63E-36 |
| Regulation of anatomical structure morphogenesis        | 3.30E-34 |
| Animal organ morphogenesis                              | 5.20E-34 |

b

| Description (KEGG)                     | q-value  |
|----------------------------------------|----------|
| Hematopoietic cell lineage             | 6.92E-18 |
| ECM-receptor interaction               | 1.29E-17 |
| Focal adhesion                         | 3.59E-16 |
| Arginine and proline metabolism        | 1.69E-14 |
| Vascular smooth muscle contraction     | 9.69E-14 |
| Cytokine-cytokine receptor interaction | 4.24E-13 |
| Chemokine signaling pathway            | 8.44E-13 |
| Arachidonic acid metabolism            | 7.94E-12 |
| Viral myocarditis                      | 4.05E-11 |
| Cell adhesion molecules (CAMs)         | 1.21E-10 |
| Leukocyte transendothelial migration   | 1.37E-10 |
| Type 1 diabetes mellitus               | 3.19E-10 |
| Graft-versus-host disease              | 1.66E-09 |
| Drug metabolism - cytochrome P450      | 3.22E-09 |
| Leishmania infection                   | 3.22E-09 |
| Allograft rejection                    | 3.33E-09 |
| PPAR signaling pathway                 | 1.03E-08 |
| Calcium signaling pathway              | 1.58E-08 |
| Complement and coagulation cascades    | 6.91E-08 |
| Glycolysis / Gluconeogenesis           | 8.37E-08 |

c

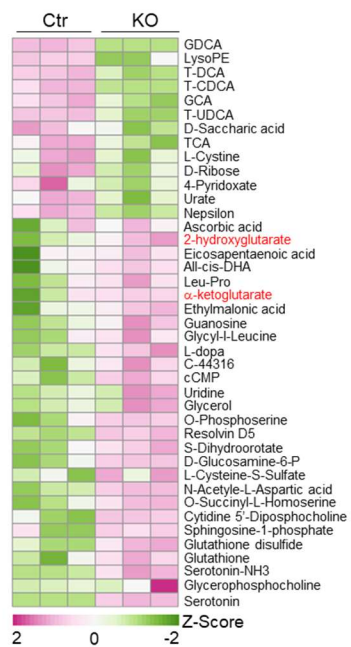

d

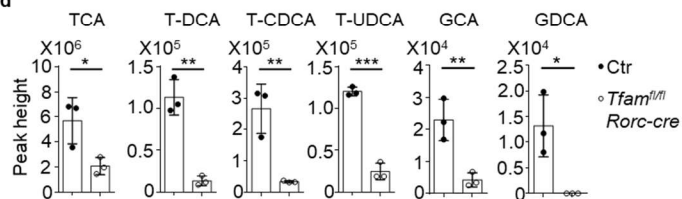

e

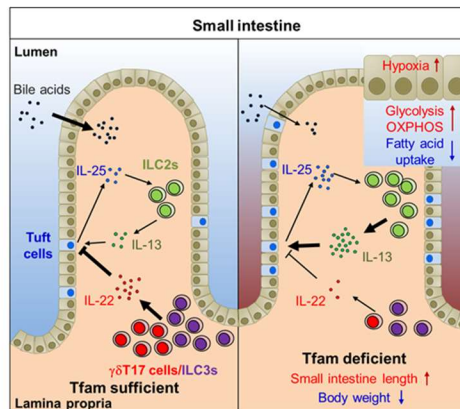

**Supplementary Fig. 8 *Tfam* deletion in ROR $\gamma$ <sup>t</sup> lymphocytes leads to global metabolomic changes in the small intestine.** Ctr included *Tfam*<sup>+/+</sup>*Rorc-cre* and *Tfam*<sup>fl/+</sup>*Rorc-cre* mice. KO indicated *Tfam*<sup>fl/fl</sup>*Rorc-cre* mice. **a-b**, GO analysis (**a**) or KEGG analysis (**b**) of the 1838 DEGs in RNA-seq data of the small intestinal tissues as shown in **Fig. 5a**. **c**, Heatmap of differentially regulated metabolites between the small intestinal tissues of Ctr and *Tfam*<sup>fl/fl</sup>*Rorc-cre* groups (n=3). Metabolites were ranked in a descending order based on the fold changes of abundance (Ctr/KO). **d**, Peak height values of differentially regulated bile acids in the small intestinal tissues identified by the metabolome analysis (n=3) (mean  $\pm$  SD) (TCA, \**P*=0.0332; T-DCA, \*\**P*=0.0014; T-CDCA, \*\**P*=0.0069; T-UDCA, \*\*\**P*=0.0001; GCA, \*\**P*=0.0089; GDCA, \**P*=0.0192). **e**, Working model of *Tfam*-mediated mitochondrial metabolism in regulation of  $\gamma\delta$ T17 cell and ILC3 maintenance, as well as small intestine tissue remodeling and immunity.

## Supplementary Tables

**Supplementary Table 1. Tissue specific genes (TSGs) in the splenic (Sp), small (SI) and large intestinal (LI)  $\gamma\delta$ T17 cells.**

| Category              | Genes                                                                                                                                                                                                                                                                                                                                                                                                                                                                                                                                                                                                                                                                                                                                                                                                                                                          |
|-----------------------|----------------------------------------------------------------------------------------------------------------------------------------------------------------------------------------------------------------------------------------------------------------------------------------------------------------------------------------------------------------------------------------------------------------------------------------------------------------------------------------------------------------------------------------------------------------------------------------------------------------------------------------------------------------------------------------------------------------------------------------------------------------------------------------------------------------------------------------------------------------|
| Sp TSGs (50)          | <i>Adgre4, Apoc1, Arl4c, Cadm1, Ccr10, Ccr3, Cd5l, Cfp, Cmb1, Cyp2s1, E2f2, Ear2, Epb4.1l3, Fcna, Fstl4, Fut7, Fxyd4, Gfra2, Ggt1, Gpr146, Gypa, Hmox1, Hpgd, Il18, Itgad, Lrrc75b, Mal, Mertk, Mrap, Nccrp1, Nhsl2, Nr1h3, Pdlim4, Popdc2, Rom1, S1pr1, Sbk1, Sema4a, Serp2, Slc22a4, Slc40a1, Snx22, Spic, Stmn2, Tbx2r, Tlr1, Tmem51, Tppp3, Trem14, Vcam1, Vipr1</i>                                                                                                                                                                                                                                                                                                                                                                                                                                                                                       |
| Intestinal TSGs (113) | <i>2010300C02Rik, 4930503L19Rik, Abcb1a, Acta2, Actg2, Ahrr, Areg, Asb2, Atf3, B3galt5, Bambi, Bgn, Bhlhe40, Ccdc162, Ccl3, Ccl4, Ccl8, Ccno, Ccrl2, Cd160, Cd200r4, Cd93, Cdkn1a, Col1a1, Col1a2, Col3a1, Col6a1, Col6a2, Crem, Ctla4, Cxcl10, Cxcl2, Cxcl3, Cyp2j6, Dusp4, Dusp6, Eaf2, Egr1, Eln, Emid1, Fam167a, Fbln1, Fhl2, Fosb, Fosl2, Gadd45b, Gem, Gimap7, Gjb2, Gm5616, Gpnmb, Gstm5, Hbegf, Hic1, Hilpda, Hist1h1d, Hs3st1, Hspa1a, Hspa1b, Il17a, Il1r2, Il1rn, Il22, Itih5, Jchain, Jun, Kit, Liltr4b, Lrrn2, Ltbp4, Lum, Maff, Mfap4, Mgp, Mmp2, Mmp23, Myl10, Myl9, Mzb1, Neur13, Nfkb1a, Nfkbid, Nfkbiz, Nr4a1, Nr4a2, Nr4a3, Nrgn, Osgin1, P2rx7, Pcd1lg2, Pdgfrb, Phlda1, Plk2, Ppp1r3b, Pram1, Ptgs2, Rarres2, Rgs1, Serpinb9, Serping1, Serpinh1, Sik1, Skil, Sparc, Spry1, Tbx21, Tgif1, Thbs1, Tnfaip3, Tnfsf11, Tpm2, Ucp3, Vps37b</i> |
| SI TSGs (12)          | <i>Agr2, Art2b, Clu, Flt4, Gkn3, Grtp1, Il17f, Mmp9, Ogdhl, Pcp4, Ret, Tff2</i>                                                                                                                                                                                                                                                                                                                                                                                                                                                                                                                                                                                                                                                                                                                                                                                |
| LI TSGs (7)           | <i>Adgrg1, Agt, Ctgf, Gm9780, Klrb1c, Postn, Serpina3n</i>                                                                                                                                                                                                                                                                                                                                                                                                                                                                                                                                                                                                                                                                                                                                                                                                     |

**Supplementary Table 2. Differentially expressed genes (DEGs) between splenic control and Tfam-deficient  $\gamma\delta$ T17 cells.**

| Category               | Genes (Tfam-deficient versus control)                                                                                                                                                                                                                                                                                                                                                                                                                                                                                                                                               |
|------------------------|-------------------------------------------------------------------------------------------------------------------------------------------------------------------------------------------------------------------------------------------------------------------------------------------------------------------------------------------------------------------------------------------------------------------------------------------------------------------------------------------------------------------------------------------------------------------------------------|
| Sp upregulated (75)    | <i>Abcb1a, Abcb9, Acadsb, Acss2, Ajuba, Als2, Apol7e, Aqp9, Art2b, Atp8a2, Btla, Ccr7, Cd160, Cd27, Cd6, Chchd6, Ctsw, Dpp4, Enpp5, Ets2, Fam101b, Fam189b, Gimap4, Gimap7, Gm20696, Gramd3, Ifit80, Il12rb2, Inpp4b, Izumo1r, Lancl1, Lck, Ldlrap1, Mboat1, Mctp2, Metrnl, Myc, Nipal1, Nop2, Nsg2, P2rx7, Padi2, Papss2, Pcsk1, Prf1, Prkch, Ptger4, Rab6b, Rapgef3, Rrp1b, Rundc3b, Scml4, Sell, Serpina3f, Sh2d1a, Slamf7, Slc14a1, Slc2a1, Slc9a2, Smyd3, Tcf7, Tgfb3, Themis, Tlr12, Tnfrsf23, Tnfrsf26, Tsc22d1, Ubash3a, Vav3, Wdr24, Wdr41, Wee1, Xcl1, Zbtb20, Zfp683</i> |
| Sp downregulated (190) | <i>1500009L16Rik, 6330408A02Rik, 9430020K01Rik, Abi3bp, Ablim3, Acpp, Acsbg1, Adam12, Adam8, Adrbk2, Agpat4, Agpat9, Amica1, Anxa1, Anxa2, Ap1s2, Aqp3, Arap3, Arnt2, Arrb1, Atg7, Atrnl1, B3gnt5, Bcl2a1a, Bsn, Capg, Car5b, Carhsp1, Casp1, Ccdc50, Ccnb2, Cd163l1, Cd48, Cdc14b, Cdc25b, Cenpa, Cers4, Chst10, Cib2, Clnd1, Clnk, Cmah, Cnksr1, Cnot6, Cpe, Cpm, Crmp1, Cryba4, Cyp4f16, Daam1, Dap, Ddx28, Dennd5a, Dnah8, Dusp14, Dusp3, E2f2, Elf3, Endod1, Erbb2, Fah, Fam109b, Fam129b, Fam179a, Fam89a, Fgl2, Flnb, Fut7, Gcnt1, Gdpd5, Ggh,</i>                           |

|  |                                                                                                                                                                                                                                                                                                                                                                                                                                                                                                                                                                                                                                                                                                                                                                                                                                                                                                                       |
|--|-----------------------------------------------------------------------------------------------------------------------------------------------------------------------------------------------------------------------------------------------------------------------------------------------------------------------------------------------------------------------------------------------------------------------------------------------------------------------------------------------------------------------------------------------------------------------------------------------------------------------------------------------------------------------------------------------------------------------------------------------------------------------------------------------------------------------------------------------------------------------------------------------------------------------|
|  | <p><i>Glipr1, Gm9961, Gng2, Gpr160, Hip1r, Hopx, Hs6st2, Igsf9b, Irf4, Itga4, Itga5, Itgb1, Itgb4, Itpr3, Kcnk1, Klf10, Klf12, Klf8, Klf13, Klrb1b, L1cam, Lgals1, Lmn1b, Lpcat1, Ltb4r1, Mal, Man1c1, Map6, Mapk6, Msc, mt-Co1, mt-Cytb, mt-Nd1, mt-Nd2, mt-Nd4, mt-Nd5, mt-Nd6, Myo1e, Myo1f, Naga, Nbeal2, Nccrp1, Ndst1, Nid1, Nipal3, Npnt, Nqo2, Nrp1, Nsmf, Nxn12, Osbpl3, Osbpl6, Pde1c, Pepd, Phf11b, Pik3cg, Plcb4, Plcd1, Plekho2, Plxdc1, Popdc2, Ppap2c, Ppp2cb, Prex1, Prr29, Prr5l, Psd2, Ptpn4, Pycard, Rap1gap2, Rln3, Rnf43, Rnpep, Rom1, Runx2, Ryk, S100a10, S100a4, Scpep1, Sdcbp2, Sec11c, Selm, Sepp1, Serinc2, Sgk1, Slc15a3, Slc1a5, Slc22a15, Slc52a3, Slc6a13, Socs2, Spcs3, Spink2, Spn, Spon2, St6galnac6, Steap3, Stmn2, Stx11, Sun1, Syt11, Tbc1d2, Tdrd9, Tfam, Thbd, Ticam1, Tmem171, Tmem37, Tmem50b, Tns4, Tppp3, Tspan6, Tubb3, Txndc5, Upp1, Vill, Wdfy2, Zbtb16, Zbtb32</i></p> |
|--|-----------------------------------------------------------------------------------------------------------------------------------------------------------------------------------------------------------------------------------------------------------------------------------------------------------------------------------------------------------------------------------------------------------------------------------------------------------------------------------------------------------------------------------------------------------------------------------------------------------------------------------------------------------------------------------------------------------------------------------------------------------------------------------------------------------------------------------------------------------------------------------------------------------------------|

**Supplementary Table 3. DEGs between small intestinal control and Tfam-deficient  $\gamma\delta$ T17 cells.**

| Category               | Genes (Tfam-deficient versus control)                                                                                                                                                                                                                                                                                                                                                                                                                                                                                                                                                                                                                                                                                                                                                                                                                                                                                                                                                                                                                                                                                                                                                                                                                                                                                                                                                                                                                                                                                                                                                                                                                                                         |
|------------------------|-----------------------------------------------------------------------------------------------------------------------------------------------------------------------------------------------------------------------------------------------------------------------------------------------------------------------------------------------------------------------------------------------------------------------------------------------------------------------------------------------------------------------------------------------------------------------------------------------------------------------------------------------------------------------------------------------------------------------------------------------------------------------------------------------------------------------------------------------------------------------------------------------------------------------------------------------------------------------------------------------------------------------------------------------------------------------------------------------------------------------------------------------------------------------------------------------------------------------------------------------------------------------------------------------------------------------------------------------------------------------------------------------------------------------------------------------------------------------------------------------------------------------------------------------------------------------------------------------------------------------------------------------------------------------------------------------|
| SI upregulated (224)   | <p><i>1190002N15Rik, 1500012F01Rik, 1700025G04Rik, 5830411N06Rik, Abtb2, Acer2, Actn1, Acvr2a, Adam19, Ado, Alcam, Aldh2, Als2, Amz1, Angptl6, Anxa4, Arl4c, Arrdc3, Asns, Atf5, Atxn1, Aurkb, Bag1, Basp1, Bbc3, Bcl6, Bend5, Btla, C3, Ccnb2, Ccr7, Cd200, Cd27, Cd274, Cd9, Cfl2, Chdh, Ciart, Cited4, Cks1b, Clic4, Clybl, Coa7, Cox6a2, Cxcl1, Cyp2s1, Cyp51, Dapk2, Ddit3, Dzip1, Eef1g, Eif4ebp1, Eif5, Eif5a2, Emilin1, Faf1, Fam129c, Fam58b, Fam92a, Fas, Fgr, Gab2, Galm, Gbp2, Gbp3, Gbp5, Gbp6, Gbp8, Ggt5, Gja1, Gla, Glrx, Gm2a, Gpr146, Gucd1, Gzmb, H2-Ob, Hcar2, Hells, Hist1h1b, Hist1h1d, Hlf, Hpgds, Hs3st1, Hspa2, Hspa8, Hspe1, Hvcn1, Id3, Idh2, Ifngr2, Igfbp4, Iigp1, Il12rb2, Il17rb, Il1r2, Il21r, Il4, Izumo1r, Kcnn4, Klf23, Klf2, Klf3, Kntc1, Lgals3, Lilrb4a, Mboat1, Mcm3, Mcm8, Metrnl, Mettl13, Mettl22, Mfsd6, Mki67, Mmgt1, Mrpl30, Msmo1, Mta1, Mthfd1l, Mthfd2, Mturn, N4bp2, Nab2, Nabp2, Nampt, Nck2, Ndc80, Nipal1, Nqo1, Nupr1, Oas3, P4ha2, Parp11, Parp3, Pbx2, Pcsk1, Pdlim1, Pecr, Phgdh, Phka2, Pik3ip1, Pira2, Pkmyt1, Plac8, Plaur, Plscr3, Plxdc2, Pmepa1, Ppp3ca, Prkch, Ptger2, Ptger4, Ptgir, Ptms, Pus7, Pygl, Rasal1, Rasl11a, Rcan3, Rgs12, Rhbdd3, Rhob, Rpl13, Rpl22l1, Rpl32, Rpl4, Rps19, Rps7, Rras2, Sars, Satb1, Scarb1, Senp2, Sepw1, Shmt2, Slc16a1, Slc1a4, Slc35g1, Slc6a9, Slc7a3, Slc7a5, Ssbp2, Stat1, Stom, Taf10, Tapt1, Tbc1d4, Tcf7, Tef, Tesc, Tfdp1, Tgfb3, Tgfr3, Tgm2, Thbs1, Themis, Thra, Tmem107, Tmem97, Tnfrsf23, Tnfrsf26, Tnfrsf4, Top2a, Trat1, Trib2, Trib3, Trim59, Tsc22d1, Tspan31, Ttc3, Tuba8, Ubash3a, Ubc, Ugcg, Uhrf1, Usp18, Wdr86, Xaf1, Xdh, Ybx1, Zcwpw1, Zdhhc8, Zfp281, Zfp524</i></p> |
| SI downregulated (243) | <p><i>2010300C02Rik, 5430421N21Rik, A830080D01Rik, Ablim3, Acot9, Acpp, Actrt3, Adam12, Ahrr, Aifm1, Aifm2, Akr1c12, Ang, Anks3, Arap3, Areg, Arg1, Arrdc4, Art2b, B3galt5, Bbs4, Bcl2a1a, Bcl2a1c, Bcl2a1d, Bhlhe40, Bmp4, Bspry, Btbd10, Cap2, Capg, Ccbl2, Ccdc125, Ccdc137, Ccl20, Ccn1, Ccr2, Cd163l1, Cd69, Cdc14a, Cdh10, Cdk14, Cep44, Cers4, Chad, Clnk, Clstn3, Cnksr3, Comt, Cpe, Crmp1, Csf2, Csn3, Cxcl13, Cxcr3, Cxcr6, Cyp2j6, Cyp4f16, Daam1, Ddx25, Derl3, Dkk3, Dlg5, Dmrta1, Dnajb2, Dnajb5, Dnajc12, Dusp4, Dusp6, Enc1, Eps8l3, Ern1, Exog, F2r, Fam110a, Fasl, Fastkd3, Fhl2, Frmd5, Gadd45b, Gch1, Gdpd5, Gem, Gimap4, Gpatch2, Gpd2, Hbegf, Hexim1, Hjurp, Hlcs, Hs6st2, Hsd11b1, Icam1, Icam2, Igf1r,</i></p>                                                                                                                                                                                                                                                                                                                                                                                                                                                                                                                                                                                                                                                                                                                                                                                                                                                                                                                                                        |



|  |                                                                                                                                                                                                                                                                                                                                                                                                                                                                                                                                                                                                                                                                                                                                                                                                                                                                                                                                                                                                                                                                                                                                                       |
|--|-------------------------------------------------------------------------------------------------------------------------------------------------------------------------------------------------------------------------------------------------------------------------------------------------------------------------------------------------------------------------------------------------------------------------------------------------------------------------------------------------------------------------------------------------------------------------------------------------------------------------------------------------------------------------------------------------------------------------------------------------------------------------------------------------------------------------------------------------------------------------------------------------------------------------------------------------------------------------------------------------------------------------------------------------------------------------------------------------------------------------------------------------------|
|  | <p><i>Igsf5, Ikzf2, Ikzf3, Il1r1, Il2ra, Impg1, Irf5, Itga3, Itga5, Itih5, Jmjd6, Kcnk1, Kctd5, Klrb1, Klrk1, Lats2, Lax1, Ldhd, Leng9, Ligl2, Lrrc49, Lrrn2, Lsr, Ltb4r1, Ly6g5b, Maff, Magi1, Man1c1, Map3k14, March3, Marveld2, Mex3c, Mgat4a, Mitf, Mmp23, Morn3, Mrc2, Mtcl1, mt-Co1, mt-Cytb, Mtmr7, mt-Nd1, mt-Nd2, mt-Nd3, mt-Nd4, mt-Nd5, mt-Nd6, Myd88, N4bp3, Ncoa7, Nedd4l, Nfatc2, Nfkbia, Nfkbiz, Nid1, Nif3l1, Npas2, Npnt, Nrgn, Nxn12, Ogdhl, Pde11a, Pde1c, Pde2a, Pdzd2, Pik3ap1, Plcb4, Plcd1, Plekhg1, Plekhm3, Pnlsr, Pnpla6, Podnl1, Ppp1r10, Ppt2, Pqlc1, Prss12, Psd2, Ptg2, Ptpn6, Ptprz1, Rai14, Rbpms2, Rcn2, Rffl, Rgs1, Rln3, Rnf43, Rrnad1, Runx2, Scg5, Sdc4, Sec16b, Sema6a, Serinc2, Serpinb6b, Serpinb9, Sertad1, Sla, Sla2, Slc16a6, Slc23a2, Slc27a6, Slc41a3, Slc7a6os, Smyd1, Socs2, Sox13, Spn, Sppl2b, Spry1, Srsf5, Srsf6, Srxn1, St3gal3, St6galnac3, Stx11, Tbx21, Tceal1, Tex2, Tg, Tgif1, Thsd7b, Thtpa, Tifa, Tjp2, Tnf, Tnfaip3, Tnfsf14, Tns4, Tpbg, Traf1, Trim39, Tshz1, Tspan14, Tuba1a, Tuba1c, Tuba4a, Tubb4b, Txk, Ublcp1, Ucp3, Usp20, Zbtb16, Zbtb7c, Zcchc18, Zfp36, Zfp831, Zfp959</i></p> |
|--|-------------------------------------------------------------------------------------------------------------------------------------------------------------------------------------------------------------------------------------------------------------------------------------------------------------------------------------------------------------------------------------------------------------------------------------------------------------------------------------------------------------------------------------------------------------------------------------------------------------------------------------------------------------------------------------------------------------------------------------------------------------------------------------------------------------------------------------------------------------------------------------------------------------------------------------------------------------------------------------------------------------------------------------------------------------------------------------------------------------------------------------------------------|

**Supplementary Table 4. DEGs between large intestinal control and Tfam-deficient  $\gamma\delta$ T17 cells.**

| Category               | Genes (Tfam-deficient versus control)                                                                                                                                                                                                                                                                                                                                                                                                                                                                                                                                                                                                                                                                                                                                                                                                                                                                                                                                                                                                                                                                                                                                                                                                                                                                                                                                                                                                                          |
|------------------------|----------------------------------------------------------------------------------------------------------------------------------------------------------------------------------------------------------------------------------------------------------------------------------------------------------------------------------------------------------------------------------------------------------------------------------------------------------------------------------------------------------------------------------------------------------------------------------------------------------------------------------------------------------------------------------------------------------------------------------------------------------------------------------------------------------------------------------------------------------------------------------------------------------------------------------------------------------------------------------------------------------------------------------------------------------------------------------------------------------------------------------------------------------------------------------------------------------------------------------------------------------------------------------------------------------------------------------------------------------------------------------------------------------------------------------------------------------------|
| LI upregulated (193)   | <p><i>1190002N15Rik, Aars, Abcb1b, Abce1, Aktip, Aldoc, Alg2, Amz1, Angptl6, Apoa1bp, Arl4c, Arv1, Asns, Atf5, Bbc3, Bcl6, Blvrbl, Bola1, Cars, Ccdc107, Ccdc25, Ccl1, Ccr8, Cd27, Cdca7, Cdk5rap1, Cebpg, Chchd10, Chdh, Cited2, Clybl, Cpd, Crcp, Cryl1, Ctla2a, Cyb5r1, Cyp51, Dctpp1, Ddit3, Dennd2d, Dgcr6, Dnajc9, Dpf2, Dpp4, Dtnb, Dusp28, Eci2, Eef1b2, Eef1g, Eif4ebp1, Faah, Fam118a, Fam136a, Fam206a, Fam213a, Fam26f, Fam78a, Fam92a, Flot1, Fmo5, Galm, Gars, Gbp6, Gfer, Gm2a, Gm5595, Gnb2l1, Gns, Gpt2, Guk1, Hdcc2, Hist1h1d, Hist1h4c, Hist2h2bb, Hlf, Hspa9, Hyi, Iars, Ifng, Igsf6, Il9r, Izumo1r, Kdelc2, Kdsr, Khk, Kif3a, Klf2, Lair1, Lars, Ldhd, Lif, Lilrb4a, Lyz2, Lztr1, Mars, Mboat1, Metrnl, Mpnd, Mrpl30, Mrpl57, Mrps28, Msto1, Mtg1, Mthfd2, Mvb12a, Nagk, Nars, Nek4, Nelfe, Noc2l, Nphp1, Nudt2, Nupr1, Nvl, Ogfod3, Ormdl1, P4ha2, Parn, Pck2, Phgdh, Pja2, Pogk, Ptger4, Ptgir, Pwp1, Rab27b, Rce1, Rhob, Rnf145, Rpl13, Rpl18, Rpl18a, Rpl23, Rpl29, Rpl30, Rpl34, Rpl4, Rpl7a, Rps15, Rps18, Rps19, Rps24, Rps3, Rps4x, Rps5, Rps8, Rpsa, Rsad2, Ruvbl2, Sars, Scamp1, Shmt2, Sigmar1, Slamf6, Slc1a4, Slc25a23, Slc35c1, Slc6a9, Slc7a3, Slc7a5, Sprn, Ssbp2, St7, Stom, Suclg1, Sumf1, Susd1, Tmem107, Tmem205, Tmem231, Tmem29, Tmem41a, Tmem9, Tnfrsf22, Tnfrsf26, Tnfsf10, Tpi1, Trappc4, Trappc6a, Trib3, Tsc22d3, Tspan31, Tspan32, Ubash3a, Ubc, Ubqln1, Uros, Vps8, Wrbl, Yars, Yif1b, Zc4h2, Zfp759</i></p> |
| LI downregulated (403) | <p><i>2010111I01Rik, 2810417H13Rik, 4930550C14Rik, 5031414D18Rik, 8430408G22Rik, 9430020K01Rik, Abi3bp, Ablim3, Acox1, Acpp, Acsbg1, Acta2, Actg2, Adcy3, Adgrg1, Adora2a, Agpat4, Agt, Akap12, Akna, Ang, Anks1, Anp32a, Anxa1, Arap3, Areg, Arhgap31, Arl5c, Arntl, Arrdc4, Ash1l, Atg7, Atoh8, Atp2a3, Bcl2a1a, Bcl2a1c, Bcl2a1d, Bcl2l1, Bhlhe40, Birc3, Blink, Btk, C2cd2, Car2, Cblb, Ccdc125, Ccdc162, Ccdc88c, Ccnd1, Ccnl1, Ccnt1, Ccr10, Ccl2, Cd163l1, Cd59a, Cd63, Cd83, Cdh13, Cenpl, Cep250, Cercam, Chad, Chst12, Clspn, Cnn1, Col12a1, Col5a1, Col5a3, Cpm, Cpxm1, Cpz, Crem, Crmp1, Cryab, Cryba4, Csrnp1, Ctgf, Cyp2j6, D930048N14Rik, Dag1, Ddr2, Ddx25, Dennd5a, Des, Dgkh, Dkk3, Dlg5, Dmpk, Dmrta1, Dot1l, Dusp4, Dusp6, Eaf2, Ece1, Ednrb, Egr1, Ehd2, Ehd4, Elf3, Ephx1, Esam, Etv3, Extl3, F3, Fam110a, Fam214a, Fasl, Fastkd3, Fbln5, Fbxo46, Fem1b,</i></p>                                                                                                                                                                                                                                                                                                                                                                                                                                                                                                                                                                         |

|  |                                                                                                                                                                                                                                                                                                                                                                                                                                                                                                                                                                                                                                                                                                                                                                                                                                                                                                                                                                                                                                                                                                                                                                                                                                                                                                                                                                                                                                                                                                                                                                                                                                                                                                                                                                                                                                                                                                                                                                                                                                                                                                                                                                                                                   |
|--|-------------------------------------------------------------------------------------------------------------------------------------------------------------------------------------------------------------------------------------------------------------------------------------------------------------------------------------------------------------------------------------------------------------------------------------------------------------------------------------------------------------------------------------------------------------------------------------------------------------------------------------------------------------------------------------------------------------------------------------------------------------------------------------------------------------------------------------------------------------------------------------------------------------------------------------------------------------------------------------------------------------------------------------------------------------------------------------------------------------------------------------------------------------------------------------------------------------------------------------------------------------------------------------------------------------------------------------------------------------------------------------------------------------------------------------------------------------------------------------------------------------------------------------------------------------------------------------------------------------------------------------------------------------------------------------------------------------------------------------------------------------------------------------------------------------------------------------------------------------------------------------------------------------------------------------------------------------------------------------------------------------------------------------------------------------------------------------------------------------------------------------------------------------------------------------------------------------------|
|  | <p><i>Fem1c, Ffar4, Fhl1, Fkbp9, Flt3, Fn1, Fosl2, Foxo3, Frmd5, Fryl, Fscn1, Furin, Fxyd1, Gabarapl1, Gadd45b, Gdgd5, Gem, Gfod1, Gimap4, Gjb2, Glp1r, Gm15800, Gm166, Golga2, Gpr160, Gpr55, Gse1, Gys1, H3f3b, H6pd, Havcr2, Hltpda, Hip1r, Hivep1, Hopx, Hpse, Hs6st2, Hspg2, Htra1, Icam1, Ifi205, Ikzf3, Il1r1, Il2rb, Ildr1, Inpp1, Irf8, Itga5, Itgb2, Itgb5, Jam2, Jarid2, Junb, Jup, Kdm2b, Kdm6a, Kdm6b, Klf10, Klh125, Klrb1c, Klrc1, Klrk1, Krt18, L3mbtl2, Lad1, Lama5, Lamb3, Lax1, Lims2, Litaf, Lpl, Lrmp, Lrrc75a, Lrrc8c, Lrrn2, Lum, Ly6c2, Ly6d, Lyn, Magi1, Mamdc2, Man1c1, Map3k14, Mapk6, March3, Mast4, Mcc, Mex3c, Mkl1, Mmp2, Mmp3, Mpzl1, Mrc2, Msl3l2, Msrb3, mt-Co1, mt-Cytb, mt-Nd1, mt-Nd2, mt-Nd4, mt-Nd5, mt-Nd6, Myh11, Myl9, Mylk, Myo1c, Myo1e, Mzb1, Nab2, Nbeal2, Nbl1, Nbr1, Ncoa7, Neu3, Nfatc1, Nfatc2, Nfic, Nfil3, Nfkbia, Nfkbiz, Nlrc5, Notch1, Nox1, Npnt, Nr1d1, Nr4a2, Nr4a3, Nrgn, Nrp1, Nusap1, Nxn12, Ogn, Pabpc1l, Palld, Pcsk7, Pcyt1a, Pdcd1, Pdgfa, Pdzd2, Pglyrp1, Phacr2, Phc3, Pik3ap1, Pik3cg, Pik3r1, Pik3r5, Pim1, Pim3, Pira2, Pknox1, Plek, Plekhm3, Pls1, Plvap, Podnl1, Ppp1r16b, Ppp6r3, Prf1, Procr, Prom1, Prom2, Prr15l, Prr5l, Prss32, Psd2, Ptgs2, Ptpre, Ptprz1, Ptrf, R3hcc1l, Rab33b, Radil, Rbm41, Rbm5, Rbp7, Rdh10, Rel, Rem1, Rerg, Rest, Retnla, Rftn1, Rgs1, Rgs11, Rgs3, Rgs5, Rilpl2, Rin2, Rln3, Rnase2b, Rnd1, Rnf125, Rnf157, Rnf43, Rora, Rtn4r1l, Runx1, Runx2, S100a11, Samsn1, Sap130, Scube1, Sdcbp2, Sema3c, Sema4b, Serinc2, Serpina3f, Serpina3g, Serpinb6b, Sgip1, Sh2d2a, Sidt1, Sipa1, Ski, Skil, Slc15a3, Slc16a6, Slc22a15, Slc25a43, Slc27a6, Slc7a6os, Slc8b1, Slc9a3r2, Smad3, Smim3, Smoc2, Snx33, Sod3, Sorl1, Sox13, Sox18, Spry1, Srpk3, Srsf5, St14, Strn4, Stx11, Sulf1, Syne2, Synj2, Syt11, Tagln, Tbc1d1, Tbx21, Tesk2, Tex2, Tgfb1i1, Tgif1, Tmem88, Tnfaip2, Tnfaip3, Tnfrsf17, Tnfrsf1b, Tnfrsf9, Tnfp1, Tns4, Tob2, Tox, Tpbp, Tpm1, Tpm2, Traf1, Traf3, Trim11, Trio, Trp53inp2, Tspan1, Tspan8, Tspyl4, Tubb6, Txndc5, Ube2l6, Ublcp1, Utf1, Vdr, Vgll4, Vps37b, Wipi1, Wsb1, Zbtb1, Zbtb16, Zbtb21, Zbtb24, Zbtb25, Zbtb46, Zc3h12a, Zfp361l, Zfp870, Zfp871, Zmat4, Zswim4, Zswim8</i></p> |
|--|-------------------------------------------------------------------------------------------------------------------------------------------------------------------------------------------------------------------------------------------------------------------------------------------------------------------------------------------------------------------------------------------------------------------------------------------------------------------------------------------------------------------------------------------------------------------------------------------------------------------------------------------------------------------------------------------------------------------------------------------------------------------------------------------------------------------------------------------------------------------------------------------------------------------------------------------------------------------------------------------------------------------------------------------------------------------------------------------------------------------------------------------------------------------------------------------------------------------------------------------------------------------------------------------------------------------------------------------------------------------------------------------------------------------------------------------------------------------------------------------------------------------------------------------------------------------------------------------------------------------------------------------------------------------------------------------------------------------------------------------------------------------------------------------------------------------------------------------------------------------------------------------------------------------------------------------------------------------------------------------------------------------------------------------------------------------------------------------------------------------------------------------------------------------------------------------------------------------|

**Supplementary Table 5. DEGs between the small intestinal tissues of control and Tfam-deficient mice.**

| Category           | Genes (Tfam-deficient versus control)                                                                                                                                                                                                                                                                                                                                                                                                                                                                                                                                                                                                                                                                                                                                                                                                                                                                                                                                                                                                                                                                                                                                                                                                                                                                                                                    |
|--------------------|----------------------------------------------------------------------------------------------------------------------------------------------------------------------------------------------------------------------------------------------------------------------------------------------------------------------------------------------------------------------------------------------------------------------------------------------------------------------------------------------------------------------------------------------------------------------------------------------------------------------------------------------------------------------------------------------------------------------------------------------------------------------------------------------------------------------------------------------------------------------------------------------------------------------------------------------------------------------------------------------------------------------------------------------------------------------------------------------------------------------------------------------------------------------------------------------------------------------------------------------------------------------------------------------------------------------------------------------------------|
| Upregulated (1217) | <p><i>1700019L03Rik, 1810011H11Rik, 1810041L15Rik, 1810046K07Rik, 2210011C24Rik, 3632451O06Rik, 4930404N11Rik, 5330417C22Rik, 6330403A02Rik, 8430408G22Rik, 9130008F23Rik, 9430020K01Rik, A4galt, A4gnt, AA467197, Aard, Ablim3, Abtb2, Acacb, Ackr3, Acsf2, Acsl1, Acsl3, Acss1, Acta2, Actc1, Actg2, Actn1, Adam33, Adam8, Adamts15, Adamts2, Adamts7, Adamtsl1, Adcy4, Adcy5, Adgrb2, Adgre4, Adgrg1, Adgrg3, Adm, Adora3, Adrb3, Aebp1, Afap1, Agbl3, Agtpbp1, Ahnak2, Aif1l, Ajuba, Ak1, Ak4, Aldh3b2, Aldoa, Aldoc, Alox15, Alox5, Alox5ap, Alyref2, Amy1, Ang4, Angpt2, Ank1, Ankrd22, Ankrd29, Ankrd35, Ankrd37, Ano1, Ano7, Antxr1, Anxa1, Anxa6, Aoc3, Apcdd1, Aplnr, Apobec2, Apobr, Apoh, Apold1, Aqp7, Aqp9, Arg1, Arhgap35, Arhgef15, Arhgef28, Arhgef37, Arhgef9, Armcx3, Arntl2, Arsi, Art3, Asic3, Aspnl, Ass1, Atoh1, Atp1b2, Atp2a3, Atp2b4, Atp7b, AU021092, Avil, Avpi1, Avpr1a, Azin2, B4galt2, B930041F14Rik, Bace2, Bag2, Basp1, Batf3, BC051019, Bcam, Bcl6b, Bgn, Bhlha15, Bhlhe22, Bhlhe40, Biccl1, Bmx, Bnip3, Bok, Bves, C1qtnf1, C1qtnf6, C1qtnf9, C3, C4b, C4bp, C6, C7, Cabp1, Cacna1c, Cacna1h, Cacna1s, Cacna2d1, Cacna2d2, Cadm4, Calcbl, Cald1, Calhm3, Camk2b, Camk2n2, Camkk1, Camkk2, Capn13, Capn9, Car4, Car8, Casp3, Casq2, Cav1, Cav2, Cbfa2t3, Cbl, Cbr2, Cbr3, Ccdc109b, Ccdc126, Ccdc129, Ccdc28b,</i></p> |

*Ccdc62, Ccdc64, Ccdc8, Ccdc80, Ccdc92, Ccl11, Ccl24, Ccl8, Ccl9, Ccm2l, Ccnj, Ccr3, Cd248, Cd24a, Cd300ld, Cd300lf, Cd34, Cd44, Cd55, Cd59a, Cd84, Cd9, Cdh13, Cdh5, Cdkl2, Cdkl3, Cdkn2a, Cdr2l, Ceacam18, Ceacam2, Cebpe, Cela1, Cend1, Cercam, Ces1c, Ces2b, Cfh, Chad, Chat, Chpf, Chrdl1, Chrm3, Chst1, Chst12, Cib2, Cidea, Cidec, Cilp, Cish, Cited4, Ckb, Ckm, Clca1, Clca2, Cldn5, Cldn9, Clec14a, Clip3, Clip4, Clips, Cma1, Cma2, Cnn1, Cnpy1, Col12a1, Col15a1, Col16a1, Col18a1, Col1a1, Col1a2, Col24a1, Col3a1, Col4a1, Col4a2, Col5a1, Col5a2, Col5a3, Col6a1, Col6a2, Col6a3, Col6a5, Colec10, Copz2, Coro6, Cox4i2, Cpa3, Cpe, Cpeb1, Cped1, Cpne5, Cpvl, Cpxm1, Cpxm2, Cracr2a, Creb3l1, Creb3l4, Crip2, Crlf1, Crtap, Cryab, Csd2, Csf2rb, Csf2rb2, Csn3, Csrp1, Ctgf, Ctl2a, Ctsk, Ctst, Ctso, Ctxn1, Ctxn3, Cutal, Cwh43, Cxcl16, Cybrd1, Cygb, Cyp11a1, Cyp2e1, Cyp2j9, Cyp4f18, Cyp7b1, Cyr61, Cysltr1, Cyyr1, Dact3, Dbn1, Dcbl2, Dclk1, Ddah2, Ddr2, Ddx26b, Defa17, Defa24, Defa26, Defa3, Defa-rs7, Defb1, Des, Dhrs1, Diras2, Dkk2, Dmpk, Dmxl2, Dnah8, Dnajb5, Dner, Dock9, Dok2, Dpep2, Dpysl2, Dpysl3, Dtna, Duox2, Duoxa1, Duoxa2, Dusp1, Dusp18, Dusp3, Dusp4, Dusp5, E130012A19Rik, E330009J07Rik, Ear2, Ecm1, Ecsr, Edn1, Ednra, Eef2k, Efemp1, Efemp2, Efh1, Egfl7, Egl3, Ehd2, Eid2, Eln, Emilin1, Emilin2, Emp3, Enah, Endod1, Enpp3, Epdr1, Ephb3, Epn3, Erg, Ern2, Ero1l, Ero1lb, Esam, Ethe1, Etv4, Eva1b, Evpl, Exoc3l, Fabp4, Fabp5, Fads3, Fads6, Fam101a, Fam124a, Fam129a, Fam161a, Fam171a1, Fam171a2, Fam174b, Fam19a3, Fam221a, Fam222a, Fam3c, Fam43a, Fam46b, Fam46c, Fam57a, Fam64a, Fam73a, Fam73b, Fam83b, Faxc, Fbln2, Fbln7, Fbn1, Fbxl16, Fbxl21, Fbxl22, Fbxo2, Fbxo44, Fcer1a, Fcna, Fcrlb, Fdps, Fer1l4, Fer1l6, Fes, Fetub, Ffar2, Ffar3, Fgfr4, Fhl1, Fhl2, Fhl3, Filip1l, Fkbp10, Fkbp11, Fkbp14, Fkbp9, Flna, Flnb, Flnc, Flrt3, Fn1, Fnip2, Folr2, Foxp2, Frem2, Frmd5, Frmd6, Frzb, Fstl1, Fstl3, Fut2, Fxyd1, Fxyd3, Fxyd5, Fxyd6, Fyb, Fzd2, Fzd4, Fzd9, G0s2, G6pdx, Gabre, Galnt18, Galnt5, Gapt, Garnl3, Gata2, Gata3, Gatsl3, Gcgr, Gfi1b, Gfra4, Gga2, Ggh, Gja1, Gjc2, Gkn3, Glce, Glipr2, Glt1d1, Gm10384, Gm11627, Gm13889, Gm14137, Gm15284, Gm15292, Gm15299, Gm20939, Gm2a, Gm38394, Gm4980, Gm5148, Gm6696, Gm684, Gm7325, Gm766, Gm8113, Gm973, Gm9938, Gml, Gml2, Gmpr, Gna14, Gnai1, Gnat1, Gnat3, Gne, Gng13, Got1, Gp1ba, Gpc1, Gpc2, Gpc6, Gper1, Gpi1, Gpm6b, Gpnmb, Gpr153, Gpr161, Gpr183, Gpr55, Gprc5c, Gpsm1, Gpx3, Grasp, Grem1, Grk5, Grp, Grrp1, Gsdma2, Gsdmc2, Gsdmc3, Gsdmc4, Gsn, Gsto1, Gucy1b3, Gyg, Gys1, H2-Q10, Habp2, Hacd4, Hapln4, Hck, Hcn1, Hcn2, Hcn3, Hctr1, Hdc, Heb2, Hey1, Hgfac, Hid1, Higd1b, Hivep3, Hk1, Hlf, Hmcn1, Hmgn3, Hmox1, Hmx2, Hmx3, Hnmt, Homer3, Hoxa2, Hoxa3, Hoxa7, Hoxc8, Hpd, Hpgds, Hpse2, Hs3st1, Hsbp1l1, Hsd11b1, Hspb1, Hspb6, Hspb7, Htra1, Htra3, Hyal1, Id4, Iffo2, Ifi27l2b, Ifitm1, Igf1, Igfbp2, Igfbp4, Igfbp6, Igfbp7, Igsf23, Il13, Il17b, Il17rb, Il18r1, Il1a, Il1r1l, Il1rn, Il4, Il9r, Inca1, Inhba, Inhbb, Inpp5d, Insig1, Insrr, Itga2b, Itga5, Itga7, Itgb3, Itpr2, Iyd, Jph2, Kank2, Kcnb1, Kcnc3, Kcnd3, Kcne4, Kcnf1, Kcnh2, Kcnh3, Kcnh6, Kcnip2, Kcnip3, Kcnj16, Kcnj2, Kcnma1, Kcnmb1, Kcnq1, Kcnq4, Kctd1, Kctd12, Kctd15, Kctd17, Kif1a, Kif26a, Kirrel3, Kit, Klf2, Klhdc7a, Klhdc8a, Klhdc8b, Klk1, Krt17, Krt18, Krt23, Krt7, Krt79, Krt80, Krt84, Lama3, Lamc2, Large, Lbh, Lcor, Ldha, Ldlrad3, Ldlrad4, Lect2, Lgals1, Lgi3, Liltr4b, Limk1, Lims2, Lin7b, Lix1l, Lmcd1, Lmod1, Lox, Loxl1, Loxl2, Loxl4, Lpin1, Lpl, Lrmp, Lrp11, Lrrc10b, Lrrfip1, Ltbp1, Ltbp3, Ltc4s, Lum, Ly6c2, Ly6d, Ly6g6d, Ly6g6f, Lyl1, Lynx1, Madcam1, Map1a, Map1b, Marcks, Marveld1, Matk, Matn2, Mcam, Mcpt1, Mcpt2, Mcpt4, Mcpt9, Mctp1, Mdfi, Me1, Mecom, Medag, Mfap2, Mfap3l, Mfsd4, Mgl2, Mgl1, Mical3, Mlph, Mmp10, Mmp11, Mmp14, Mmp15, Mmp17, Mmp19, Mmp2, Mmp23, Mmp25, Mmp3, Mmp9, Mns1, Mnx1, Mpp3, Mptx1, Mptx2, Mr1, Mrc2, Mrgpra9, Mrgpre, Mrgprf, Mrvi1, Ms4a2, Msi1, Msrb1, Msrb2, Msrb3, Mt3, Mtss1l, Muc2, Muc3a, Mustn1, Mycn, Myh10, Myh11, Myl9, Myo18b, Myo1b, Myo1c, Myo5c, Myocd, Myom1, Myrip, Naaa, Napepld, Natd1, Nav2, Ncf1, Ncs1, Ndr2, Ndufa4l2, Neb, Neb1, Nedd9, Nes, Neto1, Neu3, Neurl1a, Nexn, Nfe2, Nlgn2, Nmu, Nmur1, Nmur2, Nol3, Nos3, Notch3, Notch4, Notum, Npas4, Npdc1, Nptx2, Nr2f1, Nr4a2, Nradd, Nrep, Nrgn, Nrp2, Nrros,*

|                     |                                                                                                                                                                                                                                                                                                                                                                                                                                                                                                                                                                                                                                                                                                                                                                                                                                                                                                                                                                                                                                                                                                                                                                                                                                                                                                                                                                                                                                                                                                                                                                                                                                                                                                                                                                                                                                                                                                                                                                                                                                                                                                                                                                                                                                                                                                                                                                                                                                                                                                                                                                                                                                                                                                                                                                                                                                                                                                                                                                                                                                                                                                                                                                                                                                                                                                                                                                                                                                                                                                                                                                                                           |
|---------------------|-----------------------------------------------------------------------------------------------------------------------------------------------------------------------------------------------------------------------------------------------------------------------------------------------------------------------------------------------------------------------------------------------------------------------------------------------------------------------------------------------------------------------------------------------------------------------------------------------------------------------------------------------------------------------------------------------------------------------------------------------------------------------------------------------------------------------------------------------------------------------------------------------------------------------------------------------------------------------------------------------------------------------------------------------------------------------------------------------------------------------------------------------------------------------------------------------------------------------------------------------------------------------------------------------------------------------------------------------------------------------------------------------------------------------------------------------------------------------------------------------------------------------------------------------------------------------------------------------------------------------------------------------------------------------------------------------------------------------------------------------------------------------------------------------------------------------------------------------------------------------------------------------------------------------------------------------------------------------------------------------------------------------------------------------------------------------------------------------------------------------------------------------------------------------------------------------------------------------------------------------------------------------------------------------------------------------------------------------------------------------------------------------------------------------------------------------------------------------------------------------------------------------------------------------------------------------------------------------------------------------------------------------------------------------------------------------------------------------------------------------------------------------------------------------------------------------------------------------------------------------------------------------------------------------------------------------------------------------------------------------------------------------------------------------------------------------------------------------------------------------------------------------------------------------------------------------------------------------------------------------------------------------------------------------------------------------------------------------------------------------------------------------------------------------------------------------------------------------------------------------------------------------------------------------------------------------------------------------------------|
|                     | <p><i>Nrtn, Nt5c2, Nt5dc2, Nt5e, Ntng2, Nucb2, Nxpe4, Oas1c, Oas1f, Oaz2, Obfc1, Odf2l, Ogdhl, Olfml2b, Oosp1, Opn3, Optc, Otud3, Oxct1, P2rx1, P2rx7, P2ry14, P3h1, P3h2, P3h4, P4ha1, P4ha2, Pacsin1, Pacsin3, Padi2, Pak6, Palmd, Pam, Pamr1, Paqr8, Pcdh7, Pcolce, Pcp4, Pcp4l1, Pcsk6, Pcx, Pcyox1l, Pde2a, Pde7a, Pde8a, Pdlim3, Pdlim4, Pdlim7, Pdzd2, Pdzd7, Pea15a, Pecam1, Penk, Per3, Pex5l, Pfk1, Pfkm, Pgap1, Pgf, Pgm2l1, Pgm5, Phf21b, Phlda1, Phlda2, Phlda3, Phldb2, Phospho1, Pi16, Piezo2, Pik3c2g, Pik3cg, Pik3r3, Pik3r5, Pla1a, Pla2g10, Pla2g2e, Pla2g2f, Pla2g4a, Pla2g4c, Pla2g7, Plagl1, Plcb1, Plcb2, Plcb4, Plcg2, Plcl1, Plek, Plekhg1, Plekhg3, Plk2, Plod1, Pls3, Pltp, Plxnb1, Plxnd1, Pmepa1, Pmm1, Pnck, Pnliprp1, Pnliprp2, Postn, Pou2af1, Pou2f3, Ppef1, Ppef2, Ppic, Ppl, Ppm1e, Ppm1j, Ppp1r12b, Ppp1r14a, Ppp1r14c, Ppp1r16b, Ppp1r3b, Ppp1r3c, Ppp1r9a, Ppp2r3a, Prkaa2, Prkcb, Prkcdbp, Prnp, Proc, Prom2, Pros1, Prox1, Prss35, Prss53, Prune2, Ptafr, Ptges, Ptgis, Ptgs2, Pth1r, Ptpdc1, Ptpn18, Ptpn7, Ptpn2, Ptpro, Ptptr, Ptrf, Pygl, Rab11fip5, Rab15, Rab27a, Rab27b, Rab44, Rac2, Ramp1, Ramp2, Ramp3, Rap1gap, Rarb, Rasa4, Rasgef1b, Rasgrp3, Rasgrp4, Rasip1, Raver2, Rbm38, Rbp1, Rbp2, Rbp4, Rbpms, Rbpms2, Rcan3, Rcn3, Rec8, Reep2, Reep5, Reg4, Rem1, Rep15, Retnla, Retnlb, Retnlg, Rexo2, Rgs11, Rgs13, Rgs18, Rgs22, Rgs4, Rgs5, Rhbdl3, Rhoj, Rnase1, Rnase2a, Rnd1, Rnf183, Rnf207, Rnf32, Rprml, Rps6ka2, Rras, Rsad1, Rspo3, Rtn2, Rundc3a, Ryr3, S100a1, S100a13, S100a6, S100g, S1pr1, Samd14, Samd4, Samd9l, Samsn1, Scarb1, Scd1, Scgb2b17, Scgb2b20, Scgb3a1, Scin, Scn1b, Scnn1a, Scube2, Sdc3, Selm, Selp, Sema3g, Sema4c, Sema6c, Sema7a, Sepn1, Serp2, Serpina3n, Serpinb5, Serpine1, Serpine2, Serpinf1, Serpinf2, Serping1, Serpinh1, Serpini1, Setbp1, Sez6l2, Sftpa1, Sfxn3, Sgca, Sgcd, Sh2d6, Sh2d7, Sh3bgr, Sh3d21, Sh3kbp1, Sh3pxd2b, Sh3rf2, Sh3yl1, Shf, Shisa4, Siglecf, Sik1, Six5, Slamf9, Slc16a1, Slc16a12, Slc16a3, Slc16a7, Slc17a9, Slc18a1, Slc18a2, Slc18a3, Slc1a4, Slc20a1, Slc23a3, Slc25a12, Slc27a1, Slc28a1, Slc28a2, Slc2a1, Slc2a10, Slc2a4, Slc2a8, Slc35e4, Slc35g2, Slc36a4, Slc45a3, Slc4a7, Slc4a8, Slc5a9, Slc6a17, Slc8a2, Slc9a3, Slco4a1, Slit2, Slk, Smim1, Smim3, Smpx, Smtn, Smyd1, Snai2, Sncaip, Snrnp25, Soat1, Sobp, Sod3, Sorbs2, Sorcs2, Sox17, Sox18, Sox4, Sox9, Spaca4, Spaca6, Sparc, Spdef, Speg, Spib, Spink4, Spon1, Spon2, Sprr2a3, Spry1, Spta1, Sptb, Srgn, Srp2, Ssc5d, St18, St3gal2, St3gal3, St3gal5, St3gal6, St6galnac6, Stk32c, Stk38l, Stmn3, Stra6l, Strip2, Stxbp1, Sucnr1, Sulf1, Sult4a1, Susd1, Sval1, Sybu, Sycn, Syngap1, Syngr1, Synj2, Synm, Synpo2, Syt15, Sytl4, Tagln, Tal1, Tbx2r, Tcaf1, Tcaf2, Tcf21, Tead2, Tenm3, Tesc, Tespa1, Tg, Tgfb1i1, Thbs1, Thbs2, Thbs3, Thrsp, Thsd4, Timp1, Timp2, Tle6, Tlr4, Tm6sf1, Tmed6, Tmeff1, Tmem100, Tmem116, Tmem120b, Tmem121, Tmem132a, Tmem141, Tmem198, Tmem200b, Tmem229a, Tmem255b, Tmem38a, Tmem44, Tmem45a, Tmem47, Tmem71, Tmem88, Tmtc1, Tnc, Tnfrsf11b, Tnfrsf12a, Tnfrsf21, Tnfrsf23, Tnfsf13b, Tnnt3, Tns1, Tox2, Tox3, Tpd52l1, Tph1, Tpm2, Tpsb2, Tpsg1, Trak1, Trak2, Trem12, Trib2, Trim46, Trim47, Trnp1, Trp53inp2, Trpm5, Trpv2, Tsc22d1, Tspan2, Tspan6, Ttc28, Ttl11, Ttl17, Tuba1a, Tubb2b, Tubb3, Tubb4a, Tubb6, Twist1, U90926, Ugt1a9, Unc45b, Unc5a, Unc93a, Upb1, Utp14b, Vash1, Vasn, Vav1, Vcan, Vcl, Vim, Vmn2r26, Vsig2, Vstm4, Vtn, Vwf, Wee2, Wipi1, Wnt5a, Wscd1, Wwtr1, Zdhhc14, Zeb2, Zfand2a, Zfp37, Zfp428, Zfp667, Zfp697, Zfp775, Zfp871, Zfp9, Zscan2</i></p> |
| Downregulated (621) | <p><i>1500009L16Rik, 1700011H14Rik, 1700019G17Rik, 1700024P16Rik, 1810065E05Rik, 2010001E11Rik, 2010005H15Rik, 2010106E10Rik, 2210407C18Rik, 2310007B03Rik, 4931406C07Rik, 9930012K11Rik, AA986860, Aadac, Abca1, Abcb1a, Abcg2, Abcg5, Abcg8, Abhd6, Acot12, Acsm5, Acta1, Acy1, Adamts15, Adap1, Adgrd1, Adgrg5, Adh1, Adh6a, Adk, Adprm, Afp, Agmat, Agmo, Agpat9, Aim1, Akr1b7, Akr1c19, Aldh1a1, Aldh1a7, Aldh1l1, Aldh4a1, Aldh9a1, Als2cr12, Amn, Angptl4, Ano2, Anpep, Anxa13, Aoc1, Apitd1, Aplp1, Apoc3, Apol10a, Apol11b, Apol7b, Apol7e, Aqp1, Aqp3, Aqp4, Arhgef10l, Arl4d, Asah2, Asns, Aspa, Aspg, AY761184, B2m, B3galt5, B3glct, B3gnt6, B4galnt4, Baat, Bach2,</i></p>                                                                                                                                                                                                                                                                                                                                                                                                                                                                                                                                                                                                                                                                                                                                                                                                                                                                                                                                                                                                                                                                                                                                                                                                                                                                                                                                                                                                                                                                                                                                                                                                                                                                                                                                                                                                                                                                                                                                                                                                                                                                                                                                                                                                                                                                                                                                                                                                                                                                                                                                                                                                                                                                                                                                                                                                                                                                                                                  |

*Baiap3, Barx2, BC025446, BC089597, Bcl2l15, Bco1, Bend7, Bex1, Bfsp1, Bmp3, Bmp8b, Btla, Btnl6, C2, C2cd4a, C530008M17Rik, Cadm1, Canx, Car13, Car2, Card11, Card9, Cars, Casp1, Casp4, Casp8, Cat, Ccdc14, Ccl20, Ccl22, Ccl25, Ccl28, Ccl5, Ccnd1, Ccr5, Ccrn4l, Cd14, Cd160, Cd177, Cd247, Cd27, Cd274, Cd302, Cd36, Cd38, Cd3d, Cd3e, Cd3g, Cd6, Cd7, Cd72, Cd74, Cd86, Cd8a, Cd8b1, Cd96, Cdca7l, Ceacam1, Ceacam10, Ces1e, Ces1f, Ces2a, Chac1, Chst4, Ciita, Clca3a1, Clca3a2, Clca3b, Clca4a, Clca4b, Cldn2, Cldn8, Clic5, Cmpk2, Cndp1, Cndp2, Cobl, Cox6b2, Cpm, Crip1, Cryl1, Ctdspl, Cth, Ctrl, Ctsw, Cubn, Cxcl10, Cxcl13, Cxcl9, Cxcr3, Cxcr6, Cyba, Cyp27a1, Cyp2b10, Cyp2c65, Cyp2c68, Cyp2d22, Cyp3a11, Cyp3a13, Cyp3a25, Cyp4b1, Cyp4f40, Cyp4v3, D130043K22Rik, Dctd, Ddah1, Ddc, Defa21, Defa22, Defa-rs1, Dfna5, Dhrs11, Dio1, Dmbt1, Dnaaf1, Dnase1, Dpf3, Dpp4, Dpyd, Dtx1, E2f8, Efr3b, Enpep, Enpp7, Epb4.1l3, Epb4.1l4a, Eps8, Ereg, Exo1, Exoc3l4, Ezr, Faah, Fabp2, Fabp6, Fam118a, Fam132a, Fam151a, Fam213b, Fam26f, Far2, Farp2, Fbp1, Fbp2, Fcamr, Fcgbp, Fcgr1, Fcrl1, Ffar4, Fgfbp1, Fmo2, Fmo4, Fst, G630090E17Rik, G6pc, Gal3st2, Gbp10, Gbp2, Gbp3, Gbp4, Gbp5, Gbp6, Gbp7, Gbp8, Gcnt1, Gemin6, Ggct, Ggt1, Gimap3, Gimap4, Gimap7, Gip, Gjb2, Gjb3, Glod5, Glrx, Glud1, Gm10104, Gm11127, Gm11437, Gm12216, Gm13199, Gm15293, Gm15315, Gm28051, Gm4951, Gm7030, Gm8909, Gm9994, Gp1bb, Gpr160, Gpr17, Gpr18, Gpt, Gramd1b, Gramd1c, Grina, Gsta1, Gsta3, Gsta4, Gzma, Gzmb, H2-Aa, H2-Ab1, H2-DMa, H2-DMb1, H2-DMb2, H2-Eb1, H2-M2, H2-Q1, H2-Q2, H2-Q4, H2-Q6, H2-Q7, H2-T10, H2-T23, H2-T3, Hao2, Hes2, Hk2, Hmga2, Hnf4g, Hsd17b13, Hsd17b6, Hsd3b3, Hspa12a, Hyi, Id1, Ido1, Ifi205, Ifi47, Ifit1b1, Igtp, Iigp1, Il12rb1, Il18, Il18bp, Il21r, Il2rb, Il7, Il7r, Irf8, Irgm1, Irgm2, Isoc1, Itgad, Itk, Itpka, Kbtbd11, Kcnj10, Kctd5, Kif21b, Klra2, Klrb1b, Klrd1, Krt20, Ky, Lap3, Lck, Lct, Leap2, Lgr5, Lila5, Lipe, Lrr1, Lrrc19, Lrrc75a, Ltb, Ltbp2, Ltf, Lypd8, Lyz1, Lyz2, Maf, Mafb, Maoa, Maob, Map3k6, Mapkbp1, Me2, Mep1a, Mep1b, Mep1c, Mettl7b, Mfhas1, Mfsd7b, Mgam, Mgst1, Mgst2, Mid1, Mid2, Mme, Mmp13, Mob3c, Mocs1, Mocs2, Mov10, Mreg, Mrm1, Mro, Mroh7, Ms4a12, Ms4a18, Ms4a4b, Mtf1, Mthfd1, Mthfd2, Muc13, Mx2, Myo1a, Myo7a, Myom3, Naaladl1, Nars, Ndufa4, Nfil3, Nfkb1a, Nfkb2, Nkg7, Nlrc5, Nmi, Nos2, Nostrin, Nox1, Npc1l1, Nr1h3, Nr1h4, Nudt5, Nxf7, Oat, Ocm, Odf3b, Olfr165, Olfr56, Orc1, Osbpl1a, Otc, P2ry2, P2ry4, Panx1, Papln, Pax8, Pblid2, Pdk3, Pdlim2, Pdzd3, Pdzk1, Pepd, Perm1, Pglyrp2, Phgr1, Pianp, Pik3ap1, Pla2g5, Plb1, Plekhn1, Plet1, Pls1, Plscr1, Podnl1, Polr2k, Pram1, Prf1, Prodh, Prr15, Prr5l, Prrt1, Prss12, Prss27, Prss30, Psmb8, Psmb9, Psme2, Psme2b, Ptgr1, Ptk6, Ptpn22, Rab19, Rasd1, Rasl12, Rassf4, Rbp7, Rdh7, Rdh9, Reg3a, Reg3b, Reg3g, Retsat, Rhebl1, Rmi2, Rnf145, Rnf180, Rnf208, Rnps1, Rundc3b, Rwdd2b, S100a10, Saa2, Saa3, Satb2, Scrn2, Sec14l2, Sec14l4, Sectm1b, Sema6a, Serpina1b, Sesn1, Sgk1, Sgpl1, Sh2d2a, Shank2, Shroom1, Sla2, Slamf8, Slc10a2, Slc10a5, Slc13a1, Slc13a2, Slc15a1, Slc16a10, Slc16a5, Slc22a4, Slc22a5, Slc23a1, Slc25a13, Slc25a15, Slc25a36, Slc25a37, Slc25a45, Slc25a48, Slc26a2, Slc27a4, Slc28a3, Slc30a1, Slc34a2, Slc35f2, Slc35f5, Slc35g1, Slc36a1, Slc3a1, Slc3a2, Slc40a1, Slc41a3, Slc43a2, Slc51a, Slc51b, Slc52a3, Slc5a11, Slc5a12, Slc5a4b, Slc5a6, Slc5a8, Slc6a14, Slc6a19, Slc6a20a, Slc6a20b, Slc7a15, Slc7a7, Slc7a8, Slc9a3r1, Slco2a1, Slnf9, Smad6, Smpdl3b, Snph, Soat2, Socs3, Sowaha, Spink1, St3gal1, Stat1, Steap1, Stk10, Stom, Sult1d1, Suox, Susd2, Suv39h1, Syne4, Tap1, Tap2, Tat, Tcea3, Tfg, Tfp1, Tgtp1, Tgtp2, Tha1, Thpo, Ticrr, Tifa, Tigrit, Tlcd2, Tlhc2, Tle4, Tlr2, Tm4sf5, Tmc5, Tmcc3, Tmem236, Tmem86b, Tmigd1, Tnf, Tnfaip8l2, Tnfaip8l3, Tnfsf14, Tnfsf10, Trat1, Treh, Trib3, Trpm2, Trpm6, Tsku, Ttc36, Ttl2, Ttyh3, Tubal3, Tvp23a, Tymp, Ubd, Ugt1a1, Ugt1a6a, Ugt2a3, Ugt2b34, Ugt2b36, Ugt2b5, Uhrf1, Upk1b, Upp1, Urah, Usp2, Vnn1, Vsig10, Vwa1, Wdpcp, Wnt6, Xcl1, Xlr3a, Xpnpep1, Xpnpep2, Zap70, Zbp1, Zc3h12a, Zcchc11, Zdhhc15, Zdhhc19, Zfp385b, Zg16*

**Supplementary Table 6. Primer sequences used.**

| Primer name               | Sequence (5' - 3')       |
|---------------------------|--------------------------|
| <i>Actb</i> -F            | TGTGACGTTGACATCCGTAA     |
| <i>Actb</i> -R            | GCTAGGAGCCAGAGCAGTAA     |
| <i>Tfam</i> -F            | CCAAAAAGACCTCGTTCAGC     |
| <i>Tfam</i> -R            | ATGTCTCCGGATCGTTTCAC     |
| genome- $\beta$ -globin-F | GAGTTGAGACTGTGCTTGGC     |
| genome- $\beta$ -globin-R | TCTGCACCCAAATCATTGTT     |
| <i>Dclk1</i> -F           | GCTGTCAGTAGCTGGCAAAA     |
| <i>Dclk1</i> -R           | CAAGAGCGGTGGTTGCTATT     |
| <i>Trpm5</i> -F           | CCAGCATAAGCGACAACATCT    |
| <i>Trpm5</i> -R           | GAGCATAACAGTAGTTGGCCTG   |
| <i>Plcb2</i> -F           | CTCGCTTTGGGAAGTTTGC      |
| <i>Plcb2</i> -R           | GCATTGACTGTCATCGGGT      |
| <i>Gnat3</i> -F           | G TTCAGAGAGCAAGGAATCAGCC |
| <i>Gnat3</i> -R           | GTGCTTTTCCAGATTCACCTGC   |
| <i>Il4</i> -F             | AACTCCATGCTTGAAGAAGAACTC |
| <i>Il4</i> -R             | CCAGGAAGTCTTTCAGTGATGTG  |
| <i>Il25</i> -F            | TGGAGCTCTGCATCTGTGTC     |
| <i>Il25</i> -R            | TCAAGTCCCTGTCCA ACTCA    |
| <i>Il5</i> -F             | GTTGACAAGCAATGAGACGATGAG |
| <i>Il5</i> -R             | CCCACGGACAGTTTGATTCTTC   |
| <i>Il13</i> -F            | GCAACATCACACAAGACCAGAC   |
| <i>Il13</i> -R            | GAATCCAGGGCTACACAGAACC   |
| <i>Relmb</i> -F           | TGGTGGATCAAAGGATCAAG     |
| <i>Relmb</i> -R           | CCACAAGCACATCCAGTGAC     |
| <i>Reg3g</i> -F           | CAAGGTGAAGTTGCCAAGAA     |
| <i>Reg3g</i> -R           | CCTCTGTTGGGTTTCATAGCC    |
| <i>Igf1</i> -F            | ACCGAGGGGCTTTTACTTCA     |
| <i>Igf1</i> -R            | TGGCTCACCTTTCCTTCTCC     |
| <i>Igfbp2</i> -F          | CTGAAGGCGCTTGTCACAGG     |
| <i>Igfbp2</i> -R          | AAGGCGCATGGTGGAGATCC     |
| <i>Igf2</i> -F            | GATCCCAGTGGGGAAGTCG      |
| <i>Igf2</i> -R            | GCTGGACATCTCCGAAGAGGCTC  |
| <i>Igfbp6</i> -F          | GGTCTACAGCCCTAAGTGCG     |
| <i>Igfbp6</i> -R          | GCAGGGGCCCATCTCACTAT     |
| <i>Igf1r</i> -F           | GGAGAAGCCATGTGTGAG       |
| <i>Igf1r</i> -R           | GTCGTGGATAACGAAGCCATC    |
| <i>Igf2r</i> -F           | CCAACAGCTACCGGATGTCTG    |
| <i>Igf2r</i> -R           | ATCCCACCACAAGGATAGC      |

|                  |                           |
|------------------|---------------------------|
| <i>Igfbp4-F</i>  | GAAGCCATCCAGGAAAGCCTG     |
| <i>Igfbp4-R</i>  | CTCGCTCTGGCAGGAACCCT      |
| <i>Igfbp7-F</i>  | AAGAGGCGGAAGGGTAAAGC      |
| <i>Igfbp7-R</i>  | TGGGGTAGGTGATGCCGTT       |
| Tritrichomonas-F | AGAGGAAGGAGAAGTCGTAACAAGG |
| Tritrichomonas-R | CTCGTGTAAGAAGCCAAGACATCC  |
| Eubacteria-F     | ACTCCTACGGGAGGCAGCAGT     |
| Eubacteria-R     | ATTACCGCGGCTGCTGGC        |
